# Supplementary material
Source: PubMed Central journal article supplement (PMC4168299)
Supplement: supp_btn348_bioinf-2008-0408-File002.pdf [file supp_btn348_bioinf-2008-0408-File002.pdf]

# Supplementary Information: Discovering regulatory motifs in the Plasmodium genome using comparative genomics

Jie Wu<sup>1,4</sup>, Douglas H. Sieglaff<sup>2,3</sup>, Joshua Gervin<sup>1</sup> and Xiaohui S. Xie<sup>1,3</sup>

<sup>1</sup>Department of Computer Sciences, University of California, Irvine, CA

<sup>2</sup>Department of Molecular Biology and Biochemistry, University of California, Irvine

<sup>3</sup>Institute of Genomics and Bioinformatics, University of California, Irvine

<sup>4</sup>CODA Genomics, Laguna Hills, CA

## 1 Generalized hypergeometric distribution

### 1.1 Basic definition

Consider an urn containing  $N$  balls of different sizes, colored with either red or green. Number the balls from  $i$  to  $N$ . Denote the size of the  $i^{\text{th}}$  ball by  $p_i$  and its color by  $z_i$ , with  $z_i = 1$  representing red and  $z_i = 0$  representing green. We will define a generalized hypergeometric model as a process of randomly picking  $K$  balls from the urn without replacement, with the probability of each ball being chosen proportional to the size of the ball. Without loss of generality, we assume  $p_i$  is normalized, that is,  $\sum_{i=1}^N p_i = 1$ . A generalized hypergeometric distribution is defined as the probability on the number of the chosen balls that are red.

Let us denote the indices of  $K$  chosen balls in one trial by  $(X_1, X_2, \dots, X_K)$ , which are random variables with  $X_i \in \{1, \dots, N\}$ . The number of the  $K$  chosen balls that are red can then be expressed as

$$Y = \sum_{i=1}^K z_{X_i} \quad (1)$$

The probability of picking  $y$  green balls is then  $P(Y = y \mid \mathbf{p}, \mathbf{z}, N, K)$ , a distribution parametrized by  $N$ ,  $K$ ,  $\mathbf{s} = (s_1, \dots, s_N)$  and  $\mathbf{z} = (z_1, \dots, z_N)$ .

The standard hypergeometric distribution can be viewed as a special case of the above distribution, where the sizes of the balls are of equal size, i.e.,  $p_i = 1/N$  for all  $i$ . In this case, the distribution  $P(Y)$  can be written down explicitly

$$P(Y = y) = \frac{\binom{M}{y} \binom{N-M}{K-y}}{\binom{N}{K}} \quad (2)$$

where  $M = \sum_{i=1}^N z_i$  is the total number of red balls.

For other more general forms of  $\mathbf{p}$ , the distribution  $P(Y = y \mid \mathbf{p}, \mathbf{z}, N, K)$  is more complicated and can not be expressed into a simple form. However, the distribution will asymptotically approach the normal distribution when  $K$  is large. If we know the mean and variance of the distribution, we will have a good characterization of the probability function. Next we aim to derive the mean and the variance of the distribution.

## 1.2 Calculation of mean

Since  $Y$  is a sum of  $K$  random variables, its mean can be expressed as

$$E[Y] = \sum_{i=1}^K E[z_{X_i}] \quad (3)$$

where  $X_i$  is a random variable representing the index of the  $i^{\text{th}}$  chosen ball. By definition, the marginal probability of  $X_i$  is  $P(X_i = k) = p_k$  for all  $k = 1, \dots, N$ , and is the same for all  $i$  (Note that here we have assumed  $\mathbf{p}$  is normalized to be sum 1). Therefore,  $z_{X_i}$  is a Bernoulli variable with expectation

$$\phi \equiv E[z_{X_i}] = P(z_{X_i} = 1) = \sum_{i=1}^N z_i p_i \quad (4)$$

Accordingly, the mean of  $Y$  can be expressed as

$$\mu(N, K, \mathbf{p}, \mathbf{z}) \equiv E[Y] = K\phi = K \sum_{i=1}^N z_i p_i \quad (5)$$

## 1.3 Calculation of variance

The second moment of  $Y$  can be expressed as

$$E[Y^2] = E \left[ \sum_{i=1}^K z_{X_i}^2 + 2 \sum_{i=1}^K \sum_{j=i+1}^K z_{X_i} z_{X_j} \right] \quad (6)$$

$$= \sum_{i=1}^K E[z_{X_i}^2] + 2 \sum_{i=1}^K \sum_{j=i+1}^K E[z_{X_i} z_{X_j}] \quad (7)$$

The first part of the above equation is the second moment of  $z_{X_i}$ . Since  $z_{X_i}$  is a Bernoulli variable, its second moment is equal to its expectation, i.e.  $\phi$ . For the second part, we

notice that

$$E [z_{X_i} z_{X_j}] = P(z_{X_i} = 1, z_{X_j} = 1) \quad (8)$$

$$= \sum_{k=1}^N P(z_{X_i} = 1, z_{X_j} = 1 | X_i = k) p_k \quad (9)$$

$$= \sum_{k=1}^N P(z_{X_j} = 1 | X_i = k) z_k p_k \quad (10)$$

$$= \sum_{k=1}^N \frac{\phi - p_k}{1 - p_k} z_k p_k \quad (11)$$

Therefore, the second moment of  $Y$  is equal to

$$E[Y^2] = K\phi + K(K-1) \sum_{k=1}^N p_i z_k (\phi - p_k) (1 - p_k)^{-1} \quad (12)$$

Consequently, the variance of  $Y$  is

$$\sigma^2(N, K, \mathbf{p}, \mathbf{z}) \equiv \text{Var}[Y] = K\phi + K(K-1) \sum_{k=1}^N (\phi - p_k) p_k (1 - p_k)^{-1} z_k - K^2 \phi^2 \quad (13)$$

In the special case of the standard hypergeometric distribution ( $p_i = 1/N$  for all  $i$ ),  $\phi = M/N$  and consequently the mean is  $E[Y] = MK/N$  and the variance can be simplified to  $\text{Var}[Y] = MK(1 - M/N)(1 - K/N)/(N - 1)$ , both of which can also be derived directly from the standard hypergeometric distribution Eq. (2).

## 1.4 Simulation studies

To verify the calculation of the mean in Eq. (5) and the variance in Eq. (13), we performed a simulation study. In the study, we took  $N = 1000$  and set the first  $M = 100$  balls to be red. We did 200 simulation studies with randomly sampled values of  $\mathbf{p}$ . At each simulation, components of  $\mathbf{p}$  are randomly chosen from a uniform distribution ranged between  $[0, 1]$ . We then sampled  $K = 200$  balls according to the generalized hypergeometric process and counted the number of red balls ( $y$ ). The sampling process was repeated 1000 times, and the empirical mean and variance of  $y$  were computed from the sampled data.

The mean and variance for 200 simulation studies are shown in Figure 1. The results demonstrate a good consistency with the theoretical calculations. The figure shows a significant fluctuation in the estimation of variance from sampled data even with 1000 samples, indicating that we will need a much larger number of samples to get a consistent result when using sampling.

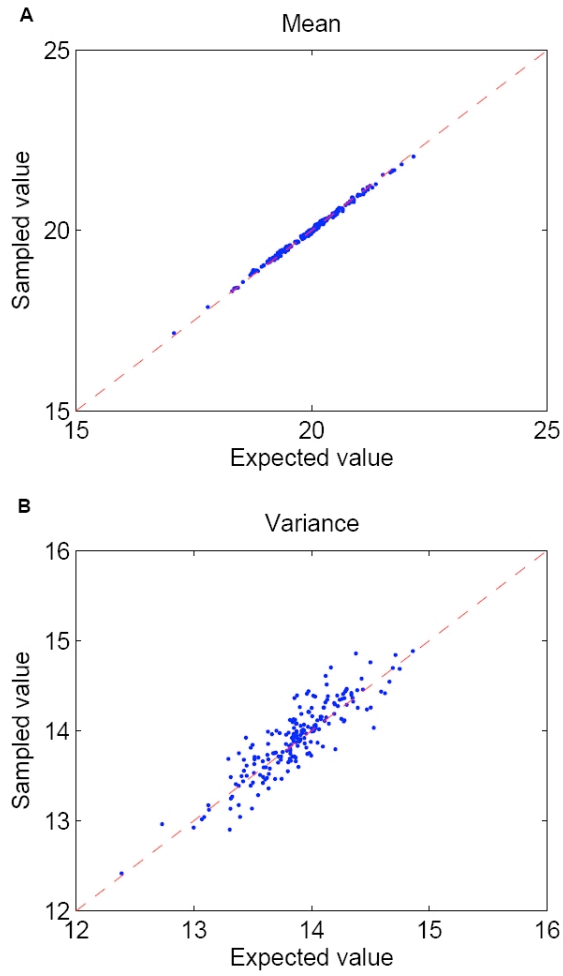

Figure 1: Comparison of mean (A) and variance (B) estimated from sampling to those calculated from theoretical derivations. X-axis shows the sampling results, and Y-axis shows its corresponding theoretical calculations.

## 2 Application of generalized hypergeometric distribution for motif discovery

The generalized hypergeometric distribution that we have defined above provides a flexible statistical framework for motif discovery using orthologous sequences. Here we describe how to fit the motif discovery scheme into the generalized hypergeometric distribution.

Suppose we are provided with  $N$  pairs of orthologous sequences from species  $A$  and  $B$ . Consider a particular motif  $m$  that occurs in  $n_A$  sequences in species  $A$ ,  $n_B$  sequences in species  $B$ , and in  $n_{AB}$  sequences in both  $A$  and  $B$ . In other words,  $n_{AB}$  is the number of sequences containing conserved instances of the motif  $m$ , and we want to find out whether  $n_{AB}$  is much higher than what is expected by chance.

The MDOS algorithm presented in the main paper defines a background model for calculating the probability of a motif occurring in each of the sequences in species  $B$ . The background model considers both the sequence composition and size of each sequence as well as neutral conservation level between orthologous sequence pairs. Based on MDOS, we can calculate the probability vector  $\mathbf{p}$  for the motif  $m$  to occur in each of the sequences in species  $B$ .

Connecting to the generalized hypergeometric distribution,  $N$  can be viewed as the total number of balls in an urn,  $M = n_A$  is the total number of red balls,  $K = n_B$  is the number of balls chosen from the urn, and  $y = n_{AB}$  is the number of chosen balls that are red. Vector  $\mathbf{p}$  specifies the probability of choosing each ball. The binary vector  $\mathbf{z} = (z_1, \dots, z_N)$  is defined as  $z_i = 1$  if the sequence  $i$  in species  $A$  contains the motif and 0 otherwise. Under this setting, the z-score characterizing the conservation of the motif is defined as

$$\text{zscore} = \frac{n_{AB} - \mu(N, n_B, \mathbf{p}, \mathbf{z})}{\sigma(N, n_B, \mathbf{p}, \mathbf{z})} \quad (14)$$

Note that the above scoring scheme is parametrized on  $\mathbf{p}$  and is independent on how  $\mathbf{p}$  is chosen. It is possible to extend the MDOS algorithm to consider a more realistic background model for calculating  $\mathbf{p}$ . The generalized hypergeometric distribution is flexible in incorporating such changes.

## 3 Application of the MDOS algorithm for discovering motifs in model organisms

We applied the MDOS algorithm to discover motifs in three model organisms – yeast, worm and fly:

**Yeast** 4,358 orthologous 1Kb promoter sequences between *S. cerevisiae* and *S. bayanus*.

**Worm** 10,894 orthologous 2Kb promoter sequences between *C. elegans* and *C. briggsae*.

**Fly** 11,306 orthologous 2Kb promoter sequences between *D. melanogaster* and *D. pseudoobscura*.

The promoter sequences of these organisms were extracted from Elemento et al. (Genome Biology, 2005) and are also available at the supplementary website of this paper.

The distribution of conservation z-scores for 7-mers show significant enrichment with large z-scores in each of the organisms (Figure 2). Note that the bulk of the distribution is centered around 0, indicating that most of the k-mers are indeed neutral. This is in contrast to the z-scores calculated from the standard hypergeometric distribution. Because it does not correct for neutral conservation due to shared ancestry, the bulk of the hypergeometric z-scores is shifted toward the positive side.

The MDOS algorithm calculated the conservation z-scores for all 7, 8 and 9-mers, and expanded significant k-mers to include degenerate codes. The high scoring motifs were further clustered to remove redundancy. The final list of distinct motifs discovered in each of the organisms is shown in the supplementary tables.

Unlike *Plasmodium*, the transcriptional regulation in the genomes of these three model organisms is well studied. In particular, a good number of motifs have been previously described for each of the organisms. Therefore, these organisms provide a good system to test how well the MDOS algorithm can discover real motifs.

We curated a list of known motifs for each of the three organisms from the Transfac database. Overall, we curated 44 motifs for yeast, 10 motifs for worm and 65 motifs for fly.

To test the performance of the MDOS algorithm for identifying real motifs, we focused on examining the properties of 7-mers. For each of the organisms, we first ranked all 7-mers according to their conservation z-scores from high to low. We then systematically identified the 7-mers that match the Transfac motifs using a motif comparing algorithm described previously (Xie et al, 2005), and checked whether the ranks of these 7-mers are biased. A bias toward lower ranks would suggest that the matching 7-mers are enriched with high conservation z-scores. We used Kolmogorov-Smirnov statistics to test such enrichment. For all three organisms, we found a significant enrichment of the matching 7-mers with low ranks (Figure 3). The enrichment p-values for the three organisms are  $3.8e^{-14}$ ,  $6.8e^{-15}$ , and  $2.2e^{-34}$  for yeast, worm and fly respectively, demonstrating that the MDOS algorithm is able to separate functional motifs from neutral ones.

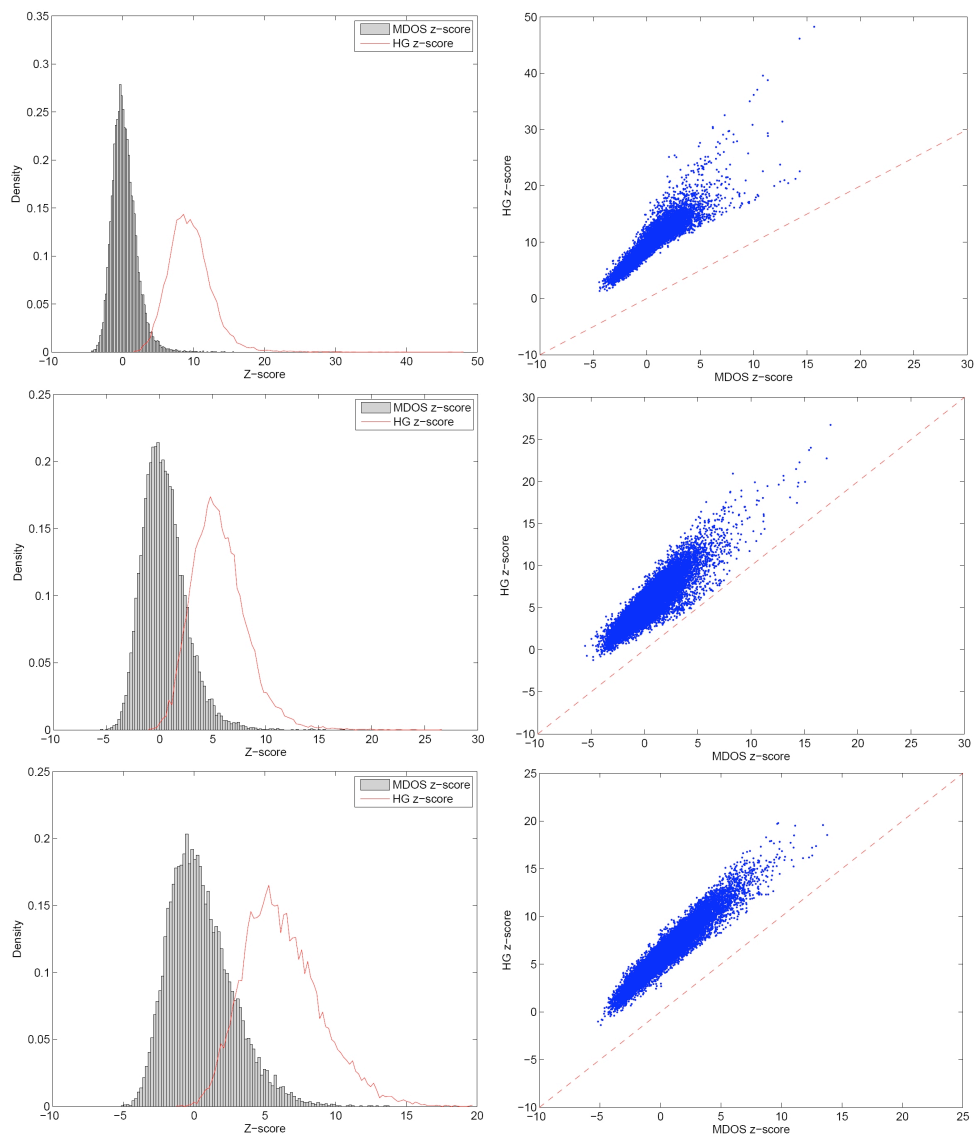

Figure 2: Distribution of conservation z-scores for all 7-mers in *S. cerevisiae* (top two panels), *C. elegans* (middle two panels) and *D. Melanogaster* (bottom two panels). Left panels show the histograms of z-scores calculated by MDOS and the hypergeometric distribution. Right panels show a comparison of the two scores for each 7-mer. HG z-score represents the hypergeometric z-score.

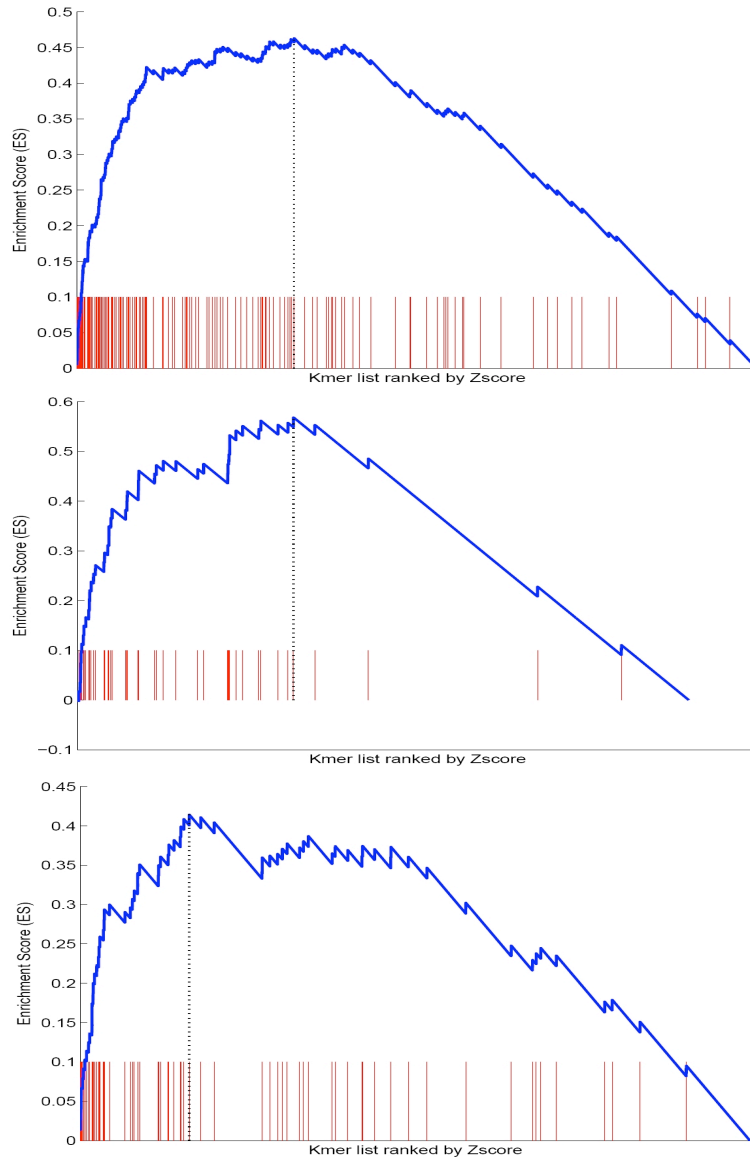

Figure 3: Enrichment of the 7-mers that match to known motifs with high z-scores in three species – yeast (top panel), worm (middle) and fly (bottom). Red vertical line shows the location of the 7-mers matching to known motifs. Blue curves plot the Kolmogorov-Smirnov enrichment scores of these 7-mers. Black line indicates the location of the maximum enrichment score. All three plots show a significant enrichment of the 7-mers matching to known motifs with high z-scores.



**Table S1** Enrichment of discovered motifs in functional gene sets (21 OPI clusters reported by Young et al, 2008)

| Motif     | GO ID      | Enrichment      |                                           |
|-----------|------------|-----------------|-------------------------------------------|
|           |            | Pvalue (-log10) | Description of the cluster                |
| TGTCTW    | GO:GNF0004 | 16.65           | Sexual Development                        |
| TGTSTR    | GO:0000278 | 16.65           | Mitotic Cell Cycle                        |
| NTTGTCTN  | GO:GNF0004 | 8.94            | Sexual Development                        |
| GTGTRY    | GO:0000278 | 11.30           | Mitotic Cell Cycle                        |
| GTSTAN    | GO:0000278 | 16.65           | Mitotic Cell Cycle                        |
| TTKNTTG   | GO:0005783 | 4.51            | Endoplasmic Reticulum                     |
| ATSTST    | GO:0000278 | 8.70            | Mitotic Cell Cycle                        |
| TTTKTK    | GO:0005783 | 2.50            | Endoplasmic Reticulum                     |
| TTNNTTKG  | GO:0005783 | 3.11            | Endoplasmic Reticulum                     |
| YCTAYA    | GO:GNF0004 | 5.46            | Sexual Development                        |
| NKTGTC    | GO:GNF0004 | 16.65           | Sexual Development                        |
| TTNNTGTY  | GO:GNF0006 | 2.80            | Sporozoite-Specific                       |
| AYACATM   | GO:0005783 | 9.94            | Endoplasmic Reticulum                     |
| TTNNTTTWG | GO:GNF0006 | 2.29            | Sporozoite-Specific                       |
| TGWTCTA   | GO:0006413 | 1.67            | Translational Initiation                  |
| GTTSTM    | GO:GNF0004 | 2.46            | Sexual Development                        |
| TAKASA    | GO:0005783 | 8.23            | Endoplasmic Reticulum                     |
| GATAKATR  | GO:0016052 | 3.63            | Carbohydrate Catabolism                   |
| TWNNTTG   | GO:0005783 | 6.41            | Endoplasmic Reticulum                     |
| TRTACR    | GO:0005783 | 16.65           | Endoplasmic Reticulum                     |
| KACATWTAT | GO:0016052 | 5.54            | Carbohydrate Catabolism                   |
| ACKAGC    | GO:0006096 | 1.62            | Glycolysis                                |
| YTMGTATT  | GO:0006720 | 2.48            | Isoprenoid Metabolism                     |
| TKTCTAWA  | GO:0006413 | 2.01            | Translational Initiation                  |
| ATAMTAMG  | GO:0016052 | 2.10            | Carbohydrate Catabolism                   |
| TTNGTY    | GO:0005783 | 4.38            | Endoplasmic Reticulum                     |
| TCTNTAWT  | GO:0006457 | 2.52            | Protein Folding                           |
| MATATACTA | GO:0000278 | 1.58            | Mitotic Cell Cycle                        |
| WAWAATGA  | GO:0005783 | 2.26            | Endoplasmic Reticulum                     |
| AAACRR    | GO:0006399 | 4.93            | tRNA Metabolism                           |
| RTGTNG    | GO:0006457 | 2.56            | Protein Folding                           |
| TANAYAT   | GO:0005783 | 9.46            | Endoplasmic Reticulum                     |
| AMTTAGRT  | GO:0005830 | 1.79            | Cytosolic Ribosome (sensu Eukarya)        |
| AAGMAATWA | GO:0019941 | 1.97            | Modification-Dependent Protein Catabolism |
| TRYATATA  | GO:0005783 | 8.86            | Endoplasmic Reticulum                     |
| RCACATKTT | GO:0030894 | 1.86            | Replisome                                 |
| ARAGAGAAR | GO:0000278 | 3.91            | Mitotic Cell Cycle                        |
| TYCTNTA   | GO:0006457 | 4.68            | Protein Folding                           |

**Table S2** Match of discovered motifs to those previously identified

| Motif     | Num in PF | Num in PY | Num in PF and PY | Z-score | Previously identified motif | Similarity score |
|-----------|-----------|-----------|------------------|---------|-----------------------------|------------------|
| TGTCTW    | 537       | 531       | 192              | 13.91   | TGTCTW                      | 1                |
| TGTSTR    | 1492      | 1414      | 786              | 12.29   | NTGTGTA                     | 0.882            |
| NTTGTCTN  | 325       | 323       | 93               | 10.80   |                             |                  |
| GTGTRY    | 1345      | 1305      | 648              | 9.78    |                             |                  |
| GTSTAN    | 1701      | 1654      | 945              | 8.91    |                             |                  |
| TTKNTTG   | 2536      | 2045      | 1585             | 6.35    |                             |                  |
| ATSTST    | 1578      | 1356      | 719              | 6.34    |                             |                  |
| TTTKTK    | 2533      | 1984      | 1535             | 6.10    |                             |                  |
| TTNNTTKG  | 2198      | 1640      | 1135             | 5.93    |                             |                  |
| YCTAYA    | 1705      | 1505      | 834              | 5.84    | TCTATAT                     | 0.816            |
| NKTGTC    | 1048      | 995       | 376              | 5.84    |                             |                  |
| TTNNTGTY  | 1601      | 1077      | 583              | 5.71    |                             |                  |
| AYACATM   | 2490      | 1765      | 1357             | 5.40    |                             |                  |
| TTNNTTTWG | 1860      | 1182      | 714              | 5.26    |                             |                  |
| TGWTCTA   | 235       | 164       | 29               | 5.22    | TGATCCA                     | 0.751            |
| GTTSTM    | 905       | 758       | 261              | 5.21    |                             |                  |
| TAKASA    | 2904      | 2480      | 2143             | 5.10    | ATATAGA                     | 0.816            |
| GATAKATR  | 981       | 621       | 236              | 5.04    |                             |                  |
| TWNTTTG   | 2878      | 2444      | 2087             | 5.03    |                             |                  |
| TRTACR    | 2872      | 2403      | 2056             | 5.02    | TATACAAC                    | 0.764            |
| KACATWTAT | 1872      | 760       | 487              | 5.00    |                             |                  |
| ACKAGC    | 63        | 199       | 15               | 4.98    |                             |                  |
| YTMGTATT  | 267       | 228       | 39               | 4.93    |                             |                  |
| TKTCTAWA  | 557       | 459       | 116              | 4.93    |                             |                  |
| ATAMTAMG  | 362       | 311       | 60               | 4.85    |                             |                  |
| TTNGTY    | 2719      | 2382      | 1934             | 4.82    |                             |                  |
| TCTNTAWT  | 938       | 710       | 245              | 4.78    |                             |                  |
| MATATACTA | 92        | 111       | 12               | 4.75    |                             |                  |
| WAWAATGA  | 1284      | 1005      | 440              | 4.74    |                             |                  |
| AAACRR    | 1846      | 2108      | 1205             | 4.73    |                             |                  |
| RTGTNG    | 1416      | 1275      | 596              | 4.68    |                             |                  |
| TANAYAT   | 2986      | 2357      | 2088             | 4.67    |                             |                  |
| AMTTAGRT  | 113       | 99        | 13               | 4.66    |                             |                  |
| AAGMAATWA | 394       | 278       | 59               | 4.65    |                             |                  |
| TRYATATA  | 2671      | 1760      | 1428             | 4.62    |                             |                  |
| RCACATKTT | 165       | 210       | 29               | 4.61    |                             |                  |
| ARAGAGAAR | 241       | 200       | 36               | 4.60    | GAGAGAA                     | 0.865            |
| TYCTNTA   | 1714      | 1230      | 678              | 4.60    |                             |                  |

PF: P. Falciparum; FY: P. yoelii  
 Similarity score is between [0, 1].

**Table S3** Enrichment of discovered motifs in functional gene sets (156 clusters reported by Zhou et al, 2008)

| Motif     | GO ID         | Enrichment Pvalue (-log10) | Description of the cluster                                                                                                                                                     |
|-----------|---------------|----------------------------|--------------------------------------------------------------------------------------------------------------------------------------------------------------------------------|
| TGTCTW    | GO:GNF0233    | 17.65                      | sexual development                                                                                                                                                             |
| TGTSTR    | GO:GNF0211    | 17.65                      | gliding motility                                                                                                                                                               |
| NTTGTCTN  | GO:PM16005087 | 9.45                       | The Plasmodium falciparum sexual development transcriptome: a microarray analysis using ontology-based pattern identification.  JOUR Molecular & Biochemical Parasitology 2005 |
| GTGTRY    | GO:0005694    | 17.65                      | chromosome                                                                                                                                                                     |
| GTSTAN    | GO:GNF0211    | 17.65                      | gliding motility                                                                                                                                                               |
| TKNTTG    | GO:GNF0211    | 8.79                       | gliding motility                                                                                                                                                               |
| ATSTST    | GO:GNF0233    | 11.23                      | sexual development                                                                                                                                                             |
| TTTKTK    | GO:GNF0004    | 8.58                       | Sexual Development                                                                                                                                                             |
| TTNTTKG   | GO:GNF0211    | 7.60                       | gliding motility                                                                                                                                                               |
| YCTAYA    | GO:GNF0211    | 17.65                      | gliding motility                                                                                                                                                               |
| NKTGTC    | GO:GNF0233    | 17.65                      | sexual development                                                                                                                                                             |
| TTNTTGTY  | GO:0008092    | 6.64                       | cytoskeletal protein binding                                                                                                                                                   |
| AYACATM   | GO:0015980    | 11.65                      | energy derivation by oxidation of organic compounds                                                                                                                            |
| TTNTTTWG  | GO:GNF0211    | 5.07                       | gliding motility                                                                                                                                                               |
| TGWTCTA   | GO:0020008    | 3.80                       | rhoptry                                                                                                                                                                        |
| GTTSTM    | GO:GNF0211    | 9.28                       | gliding motility                                                                                                                                                               |
| TAKASA    | GO:PM15032631 | 9.44                       | Mitochondrial and plastid functions as antimalarial drug targets.  JOUR Current Drug Targets--Infectious Disorders 2004                                                        |
| GATAKATR  | GO:0006413    | 6.09                       | Translational Initiation                                                                                                                                                       |
| TWNTTTG   | GO:PM15032631 | 9.91                       | Mitochondrial and plastid functions as antimalarial drug targets.  JOUR Current Drug Targets--Infectious Disorders 2004                                                        |
| TRTACR    | GO:0016052    | 17.65                      | Carbohydrate Catabolism                                                                                                                                                        |
| KACATWTAT | GO:0005794    | 5.45                       | Golgi apparatus                                                                                                                                                                |
| ACKAGC    | GO:PM14982620 | 3.28                       | Differential transcriptome profiling identifies Plasmodium genes encoding pre-erythrocytic stage-specific proteins.  JOUR Molecular microbiology 2004                          |
| YTMTGATT  | GO:PM12177071 | 4.00                       | Infectivity-associated changes in the transcriptional repertoire of the malaria parasite sporozoite stage.  JOUR The Journal of biological chemistry 2002                      |
| TKTCTAWA  | GO:GNF0211    | 5.62                       | gliding motility                                                                                                                                                               |
| ATAMTAMG  | GO:0006090    | 3.87                       | pyruvate metabolism                                                                                                                                                            |
| TTNGTY    | GO:GNF0211    | 17.65                      | gliding motility                                                                                                                                                               |
| TCTNTAWT  | GO:GNF0004    | 4.06                       | Sexual Development                                                                                                                                                             |
| MATACTA   | GO:0004721    | 2.61                       | phosphoprotein phosphatase activity                                                                                                                                            |
| WAWAATGA  | GO:0006259    | 4.42                       | DNA metabolism                                                                                                                                                                 |
| AAACRR    | GO:PM15032631 | 7.60                       | Mitochondrial and plastid functions as antimalarial drug targets.  JOUR Current Drug Targets--Infectious Disorders 2004                                                        |
| RTGTNG    | GO:0008092    | 5.87                       | cytoskeletal protein binding                                                                                                                                                   |
| TANAYAT   | GO:PM15032632 | 10.38                      | Computer assisted searches for drug targets with emphasis on malarial proteases and their inhibitors.  JOUR Current Drug Targets--Infectious Disorders 2004                    |
| AMTTAGRT  | GO:PM10395796 | 2.67                       | Interpolated Markov models for eukaryotic gene finding.  JOUR Genomics 1999                                                                                                    |
| AAGMAATWA | GO:0006090    | 3.90                       | pyruvate metabolism                                                                                                                                                            |
| TRYATATA  | GO:GNF0207    | 9.21                       | drug resistance                                                                                                                                                                |
| RCACATKTT | GO:PM16940297 | 4.10                       | Interactions between merozoite surface proteins 1                                                                                                                              |
| ARAGAGAAR | GO:0044409    | 3.39                       | entry into host                                                                                                                                                                |
| TYCTNTA   | GO:PM15935755 | 6.57                       | Proteome analysis of separated male and female gametocytes reveals novel sex-specific Plasmodium biology.  JOUR Cell 2005                                                      |

**Table S4** Estimated  $\beta$  for k-mers of different size and different GC-content

| GC number | k=6     | k=7     | k=8     | k=9     |
|-----------|---------|---------|---------|---------|
| 0         | 0.06566 | 0.03447 | 0.01607 | 0.00696 |
| 1         | 0.01175 | 0.00467 | 0.00302 | 0.00544 |
| 2         | 0.00359 | 0.00605 | 0.01255 | 0.01416 |
| 3         | 0.01295 | 0.02865 | 0.03260 | 0.01754 |
| 4         | 0.01791 | 0.03920 | 0.06070 | 0       |
| 5         | 0       | 0       | 0       | 0       |
| 6         | 0       | 0       | 0       | 0       |
| 7         |         | 0       | 0       | 0       |
| 8         |         |         | 0       | 0       |
| 9         |         |         |         | 0       |

**Table S5** Clusters of motifs discovered in the promoter regions of *S. cerevisiae*

| Motif    | Expanded motif   |                  |                |         | Motif    | K-mer            |                  |                |         | Match to known motif |                          |                  |           |
|----------|------------------|------------------|----------------|---------|----------|------------------|------------------|----------------|---------|----------------------|--------------------------|------------------|-----------|
|          | Num in species A | Num in species B | Num in A and B | Z-score |          | Num in species A | Num in species B | Num in A and B | Z-score | Transfac motif ID    | Transfac motif consensus | Similarity score | Name      |
| GCCCCCGG | 22               | 24               | 14             | 40.86   | GCCCCCGG | 22               | 24               | 14             | 40.86   | -                    | -                        | 0                | -         |
| RAAAWTTT | 851              | 667              | 460            | 20.99   | AAAAATTT | 368              | 297              | 176            | 12.73   | -                    | -                        | 0                | -         |
| CGGGTARN | 398              | 377              | 277            | 20.20   | CGGGTAAA | 66               | 70               | 31             | 4.60    | M00307               | VTTACCCGB                | 0.941            | REB1      |
| RAAAAAAN | 2709             | 2547             | 1946           | 20.11   | AAAAAAA  | 1431             | 1365             | 761            | 14.27   | -                    | -                        | 0                | -         |
| NTATATAN | 2704             | 2561             | 1935           | 18.51   | ATATATAT | 741              | 750              | 282            | 8.18    | M00713               | YHYTTATAK                | 0.772            | TBP       |
| NCACGTG  | 471              | 529              | 288            | 17.58   | TCACGTG  | 224              | 202              | 124            | 10.35   | M00064               | BVVCACGTBKN              | 0.93             | PHO4      |
| GAYGANG  | 1668             | 1695             | 1026           | 17.34   | GATGATG  | 474              | 460              | 160            | 6.09    | -                    | -                        | 0                | -         |
| ANGAYGA  | 2004             | 1988             | 1281           | 16.48   | ATGATGA  | 628              | 491              | 194            | 5.75    | -                    | -                        | 0                | -         |
| GGNGGNG  | 1281             | 1534             | 782            | 16.36   | GGTGGTG  | 257              | 316              | 100            | 6.96    | -                    | -                        | 0                | -         |
| GCNGCNG  | 1637             | 1886             | 1065           | 16.17   | GCTGCTG  | 336              | 454              | 116            | 4.44    | -                    | -                        | 0                | -         |
| GGNGANG  | 1937             | 2083             | 1279           | 15.83   | GGTGATG  | 280              | 276              | 84             | 5.04    | -                    | -                        | 0                | -         |
| GNGAYGA  | 1467             | 1430             | 818            | 15.13   | GAGATGA  | 392              | 323              | 134            | 7.79    | -                    | -                        | 0                | -         |
| CGCGTNN  | 1039             | 1122             | 570            | 14.69   | CGCGTCC  | 62               | 90               | 32             | 4.99    | -                    | -                        | 0                | -         |
| YTCTTYT  | 2959             | 2676             | 2098           | 14.56   | CTCTTCT  | 610              | 642              | 199            | 4.19    | -                    | -                        | 0                | -         |
| CGSGNAA  | 1118             | 1090             | 601            | 14.48   | CGCGAAA  | 174              | 184              | 81             | 7.45    | M00307               | VTTACCCGB                | 0.854            | REB1      |
| YGGTGGN  | 1185             | 1368             | 666            | 14.33   | TGGTGGT  | 317              | 346              | 97             | 5.09    | -                    | -                        | 0                | -         |
| TNGGYGG  | 1044             | 1186             | 575            | 14.27   | TCGGCCG  | 122              | 158              | 61             | 6.66    | M00014               | BDBTAGCCGCCVVVRV         | 0.76             | repressor |
| TGAAAAWN | 2284             | 2071             | 1402           | 13.98   | TGAAAATT | 352              | 271              | 89             | 4.81    | -                    | -                        | 0                | -         |
| KTTTCNT  | 3507             | 3231             | 2800           | 13.88   | TTTTTCAT | 1207             | 978              | 450            | 5.60    | M00664               | HTGAAAC                  | 0.831            | STE12     |
| AARAAGR  | 3002             | 2803             | 2209           | 13.78   | AAGAAGG  | 697              | 680              | 251            | 5.82    | -                    | -                        | 0                | -         |
| GNNTGGG  | 1504             | 1726             | 909            | 13.70   | GAATGGG  | 226              | 202              | 75             | 6.57    | M00213               | DRMACCCABRCAYB           | 0.821            | RAP1      |
| GANGGNG  | 1824             | 1986             | 1147           | 13.68   | GAAGGTG  | 326              | 359              | 102            | 4.09    | -                    | -                        | 0                | -         |
| ANYTCATC | 985              | 926              | 486            | 13.61   | ATCTCATC | 182              | 183              | 85             | 7.81    | -                    | -                        | 0                | -         |
| NTCTTGY  | 2349             | 2268             | 1522           | 13.54   | GTCTTGT  | 277              | 347              | 85             | 4.93    | -                    | -                        | 0                | -         |
| AARRGAA  | 3037             | 2703             | 2151           | 13.30   | AAAGGAA  | 1095             | 913              | 381            | 4.43    | -                    | -                        | 0                | -         |
| ATGGNNG  | 2204             | 2188             | 1421           | 13.17   | ATGGATG  | 299              | 293              | 85             | 4.28    | -                    | -                        | 0                | -         |
| NAGGGGN  | 1434             | 1547             | 820            | 13.01   | AAGGGGA  | 261              | 283              | 81             | 4.49    | M00308               | VAGGGGV                  | 0.991            | STRE      |
| NNAAATT  | 4084             | 3662             | 3516           | 12.68   | TGAAATT  | 871              | 751              | 294            | 4.41    | -                    | -                        | 0                | -         |
| TTNTTYA  | 3731             | 3439             | 3096           | 12.48   | TTGTTTA  | 657              | 618              | 206            | 4.66    | -                    | -                        | 0                | -         |
| TRGANGA  | 2110             | 1951             | 1248           | 12.16   | TGGAAGA  | 588              | 541              | 188            | 5.18    | -                    | -                        | 0                | -         |
| GGYAARA  | 1481             | 1309             | 732            | 12.01   | GGTAAGA  | 290              | 310              | 91             | 4.86    | -                    | -                        | 0                | -         |
| TNGGNTT  | 2679             | 2557             | 1834           | 11.89   | TTGGATT  | 428              | 385              | 114            | 4.00    | -                    | -                        | 0                | -         |
| GANATNGA | 1353             | 1276             | 673            | 11.85   | GAAATGGA | 140              | 141              | 44             | 4.41    | -                    | -                        | 0                | -         |
| ANRAAT   | 3751             | 3373             | 3045           | 11.80   | ATGAAAT  | 713              | 600              | 233            | 5.28    | -                    | -                        | 0                | -         |
| TGNNTGG  | 2265             | 2341             | 1502           | 11.77   | TGTTTGG  | 344              | 368              | 104            | 4.93    | M00213               | DRMACCCABRCAYB           | 0.757            | RAP1      |
| TGGGNGN  | 1626             | 1853             | 985            | 11.76   | TGGGAGA  | 202              | 213              | 60             | 4.54    | -                    | -                        | 0                | -         |
| GNYGGTG  | 1158             | 1337             | 617            | 11.75   | GATGGTG  | 259              | 259              | 70             | 4.03    | -                    | -                        | 0                | -         |
| TTNAANGA | 2062             | 1824             | 1148           | 11.73   | TTCAAAGA | 261              | 250              | 70             | 4.81    | -                    | -                        | 0                | -         |
| TCRTTNA  | 2443             | 2133             | 1483           | 11.73   | TCGTTTA  | 353              | 309              | 116            | 6.61    | -                    | -                        | 0                | -         |
| GANATGR  | 1923             | 1807             | 1098           | 11.73   | GAAATGA  | 519              | 430              | 143            | 4.34    | -                    | -                        | 0                | -         |
| GTGGYRA  | 886              | 892              | 411            | 11.65   | GTGGCAA  | 308              | 270              | 102            | 6.35    | -                    | -                        | 0                | -         |
| NATGGAN  | 2892             | 2655             | 2014           | 11.64   | AATGGAT  | 419              | 342              | 122            | 5.53    | -                    | -                        | 0                | -         |
| CNCCACN  | 1769             | 2124             | 1160           | 11.62   | CACCACG  | 139              | 219              | 49             | 4.02    | -                    | -                        | 0                | -         |
| TNGANCC  | 2041             | 2127             | 1297           | 11.57   | TCGACCC  | 74               | 92               | 29             | 4.41    | -                    | -                        | 0                | -         |
| NYCTCGA  | 1205             | 1376             | 644            | 11.40   | TTCTCGA  | 316              | 347              | 98             | 5.11    | M00683               | BHTCGAG                  | 0.93             | XBP1      |
| NC CRTGG | 999              | 1149             | 514            | 11.25   | CCCATGG  | 130              | 155              | 55             | 5.78    | -                    | -                        | 0                | -         |
| TRRTTNT  | 2105             | 1898             | 1180           | 11.20   | TTGTTAT  | 282              | 241              | 78             | 6.41    | M01005               | AGAACAAGAAA              | 0.762            | ste11     |
| RCNAAGA  | 2289             | 2342             | 1514           | 11.17   | ACCAAGA  | 453              | 590              | 169            | 5.08    | M00275               | NKRYBTCTTTGTTNKNYI       | 0.801            | Mat1-Mc   |
| AYGANTC  | 1324             | 1273             | 646            | 11.07   | ATGACTC  | 201              | 189              | 66             | 5.63    | M00204               | VRRTGACTCH               | 0.825            | GCN4      |
| CCCYTNA  | 1196             | 1204             | 598            | 11.04   | CCCTTAA  | 209              | 209              | 71             | 6.05    | M00308               | VAGGGGV                  | 0.832            | STRE      |
| AACAANAR | 1928             | 1858             | 1095           | 10.97   | AACAATAG | 197              | 232              | 61             | 4.87    | M00728               | YSYATTGTT                | 0.841            | ROX1      |
| TANAWAA  | 3656             | 3223             | 2859           | 10.95   | TAAATAA  | 951              | 767              | 326            | 4.29    | -                    | -                        | 0                | -         |
| NYGGCCA  | 1160             | 1431             | 641            | 10.93   | ATGGCCA  | 252              | 312              | 81             | 4.87    | -                    | -                        | 0                | -         |
| CTTGGYN  | 1641             | 1771             | 934            | 10.87   | CTTGGCA  | 281              | 361              | 89             | 4.30    | M01030               | CCAAGVAM                 | 0.878            | Rim101p   |
| GNTGYTG  | 1736             | 1873             | 1017           | 10.71   | GCTGTTG  | 319              | 323              | 90             | 4.36    | -                    | -                        | 0                | -         |
| TGRNAAAA | 1921             | 1754             | 1043           | 10.70   | TGGCAAAA | 213              | 171              | 60             | 4.27    | -                    | -                        | 0                | -         |
| TYGATRA  | 1692             | 1499             | 859            | 10.70   | TTGATAA  | 697              | 499              | 192            | 4.32    | -                    | -                        | 0                | -         |
| TTTTCNAR | 1693             | 1559             | 864            | 10.66   | TTTTCAAA | 533              | 477              | 147            | 5.07    | -                    | -                        | 0                | -         |
| NNAGATG  | 2871             | 2678             | 1999           | 10.65   | AAAGATG  | 611              | 508              | 179            | 4.77    | -                    | -                        | 0                | -         |
| TTCATNR  | 2694             | 2355             | 1718           | 10.55   | TTCATGG  | 271              | 248              | 84             | 5.83    | M00664               | HTGAAAC                  | 0.773            | STE12     |
| ATGGNYA  | 1601             | 1549             | 835            | 10.35   | ATGGTCA  | 233              | 241              | 68             | 4.23    | -                    | -                        | 0                | -         |
| TGRTCNA  | 1591             | 1628             | 862            | 10.12   | TGGTCCA  | 185              | 226              | 64             | 5.50    | -                    | -                        | 0                | -         |
| TGGCNCN  | 2019             | 2163             | 1266           | 10.10   | TGGCATC  | 242              | 257              | 73             | 4.03    | -                    | -                        | 0                | -         |
| ASCCGCN  | 841              | 909              | 407            | 10.04   | AGCCGCC  | 196              | 220              | 99             | 7.72    | M00014               | BDBTAGCCGCCVVVRV         | 0.838            | repressor |
| AAAANGGN | 2014             | 1823             | 1106           | 9.95    | AAAATGGT | 171              | 165              | 42             | 4.01    | -                    | -                        | 0                | -         |
| NGCTCRT  | 1200             | 1323             | 612            | 9.93    | AGCTCAT  | 311              | 319              | 118            | 7.43    | -                    | -                        | 0                | -         |
| NGYGTCA  | 1100             | 1085             | 507            | 9.87    | TGTGTCA  | 251              | 220              | 82             | 5.89    | M00038               | DBBBVTGACTCAYHBHB        | 0.761            | GCN4      |
| TTCCARR  | 1523             | 1564             | 803            | 9.78    | TTCCAAA  | 702              | 665              | 230            | 4.95    | -                    | -                        | 0                | -         |
| TTCRATTS | 549              | 479              | 200            | 9.75    | TTCAATTC | 199              | 179              | 57             | 5.24    | -                    | -                        | 0                | -         |
| TGGANRC  | 1518             | 1485             | 774            | 9.53    | TGGAGAC  | 180              | 180              | 50             | 4.14    | M00337               | BRGCWTCCAYWWTK           | 0.826            | GCR1      |
| TCARNTC  | 1787             | 1728             | 966            | 9.46    | TCAATTC  | 492              | 418              | 145            | 5.03    | -                    | -                        | 0                | -         |
| GCNANGG  | 1790             | 1924             | 1060           | 9.45    | GCCAAGG  | 225              | 278              | 80             | 4.34    | -                    | -                        | 0                | -         |
| CNTRGA   | 1758             | 1685             | 944            | 9.43    | CTTTGGA  | 409              | 425              | 129            | 4.68    | -                    | -                        | 0                | -         |
| GGNCCAN  | 1628             | 1958             | 991            | 9.31    | GGTCCAG  | 106              | 154              | 37             | 4.37    | -                    | -                        | 0                | -         |
| YTGNTGT  | 2145             | 2105             | 1181           | 9.27    | TTGGTGT  | 348              | 339              | 93             | 4.01    | M00030               | TGATGTRVHB               | 0.804            | MATa1     |
| NTNTGTG  | 2611             | 2424             | 1673           | 9.26    | GTTTGTG  | 270              | 290              | 76             | 4.22    | -                    | -                        | 0                | -         |
| CYATYGT  | 1179             | 1140             | 538            | 9.21    | CTATTGT  | 499              | 434              | 154            | 5.70    | M00276               | YYHATTGYD                | 0.843            | Mat1-Mc   |
| TNGATNT  | 3368             | 3158             | 2598           | 9.14    | TGGATCT  | 229              | 252              | 63             | 4.09    | -                    | -                        | 0                | -         |
| TGNTNYC  | 1419             | 1494             | 733            | 9.09    | TGGTTTC  | 375              | 416              | 111            | 4.04    | -                    | -                        | 0                | -         |
| NACATGR  | 1466             | 1441             | 741            | 9.09    | TACATGA  | 286              | 251              | 87             | 5.19    | M00031               | BBVTGTHDWH               | 0.876            | MATalpha2 |
| ACNAMAA  | 2996             | 2852             | 2159           | 8.98    | ACCACAA  | 315              | 350              | 99             | 4.37    | -                    | -                        | 0                | -         |
| TNTTNAAA | 2868             | 2464             | 1821           | 8.93    | TCTTCAA  | 270              | 276              | 70             | 4.25    | -                    | -                        | 0                | -         |
| CCANTYG  | 1458             | 1476             | 735            | 8.60    | CCAATTG  | 405              | 378              | 128            | 5.29    | -                    | -                        | 0                | -         |

|          |      |      |     |      |          |     |     |     |      |   |   |   |   |
|----------|------|------|-----|------|----------|-----|-----|-----|------|---|---|---|---|
| AWGTTYG  | 1098 | 1055 | 471 | 8.46 | ATGTTTG  | 366 | 362 | 106 | 4.86 | - | - | 0 | - |
| TGSTGCN  | 1469 | 1605 | 771 | 8.23 | TGCTGCT  | 375 | 481 | 127 | 4.98 | - | - | 0 | - |
| RANGGTAT | 606  | 596  | 224 | 8.02 | GAAGGTAT | 102 | 96  | 36  | 4.72 | - | - | 0 | - |
| SRGTTCGA | 168  | 201  | 76  | 7.19 | GGTTTCGA | 42  | 55  | 27  | 5.97 | - | - | 0 | - |
| GNTATNAA | 1429 | 1178 | 575 | 6.96 | GGTATGAA | 67  | 53  | 20  | 4.13 | - | - | 0 | - |
| GTYNGTAA | 472  | 412  | 150 | 6.95 | GTTAGTAA | 72  | 62  | 19  | 4.84 | - | - | 0 | - |
| TTTSGYGT | 367  | 310  | 124 | 6.79 | TTTCGTGT | 94  | 93  | 33  | 4.58 | - | - | 0 | - |
| TTGTGTMA | 184  | 161  | 61  | 6.66 | TTGTGTCA | 95  | 85  | 38  | 5.47 | - | - | 0 | - |
| YTTATCNG | 538  | 500  | 176 | 5.92 | TTTATCGG | 51  | 57  | 20  | 4.27 | - | - | 0 | - |
| RWTACGTA | 277  | 266  | 78  | 4.85 | ATTACGTA | 84  | 90  | 26  | 4.16 | - | - | 0 | - |

**Table S6** Clusters of motifs discovered in the promoter regions of *C. elegans*

| Motif     | Expanded motif   |                  |                |         | Motif     | K-mer            |                  |                |         | Match to known motif |                          |                  |      |
|-----------|------------------|------------------|----------------|---------|-----------|------------------|------------------|----------------|---------|----------------------|--------------------------|------------------|------|
|           | Num in species A | Num in species B | Num in A and B | Z-score |           | Num in species A | Num in species B | Num in A and B | Z-score | Transfac motif ID    | Transfac motif consensus | Similarity score | Name |
| NYCTTATCA | 1518             | 1706             | 578            | 20.44   | TTCTTATCA | 589              | 641              | 137            | 12.59   | -                    | -                        | 0                |      |
| CTGCGTCT  | 911              | 1111             | 374            | 19.44   | CTGCGTCT  | 911              | 1111             | 374            | 19.44   | -                    | -                        | 0                |      |
| TGASTCAY  | 1139             | 1436             | 430            | 18.99   | TGACTCAT  | 461              | 615              | 152            | 15.56   | -                    | -                        | 0                |      |
| NNATTTT   | 10890            | 10884            | 10881          | 18.39   | CAATTTT   | 8228             | 7248             | 5623           | 5.81    | -                    | -                        | 0                |      |
| TGCGTCTC  | 857              | 1081             | 331            | 17.39   | TGCGTCTC  | 857              | 1081             | 331            | 17.39   | -                    | -                        | 0                |      |
| YCCGCCY   | 2292             | 2803             | 1029           | 17.25   | TCCGCC    | 816              | 1393             | 294            | 13.04   | -                    | -                        | 0                |      |
| GTATAWAAG | 362              | 344              | 104            | 16.97   | GTATAAAAG | 271              | 276              | 77             | 14.78   | -                    | -                        | 0                |      |
| NNATCGAT  | 5182             | 4731             | 2766           | 16.86   | AAATCGAT  | 1695             | 1282             | 361            | 9.21    | -                    | -                        | 0                |      |
| TCTTCTYNT | 3241             | 4747             | 1858           | 15.90   | TCTTCTTCT | 973              | 2087             | 370            | 11.40   | -                    | -                        | 0                |      |
| GAYGANGA  | 2889             | 3298             | 1291           | 15.78   | GATGATGA  | 823              | 863              | 166            | 8.08    | -                    | -                        | 0                |      |
| TCTTYTCT  | 2668             | 4080             | 1388           | 14.62   | TCTTTTTCT | 1261             | 1752             | 305            | 5.14    | -                    | -                        | 0                |      |
| TTTTNAN   | 10890            | 10879            | 10876          | 14.54   | TTTTCAT   | 6952             | 6592             | 4353           | 4.08    | -                    | -                        | 0                |      |
| CYCCGCCY  | 1179             | 1668             | 482            | 14.52   | CTCCGCC   | 530              | 1049             | 193            | 9.89    | -                    | -                        | 0                |      |
| CYCTCTY   | 4441             | 5764             | 2819           | 14.32   | CTCTCTC   | 2032             | 2843             | 803            | 9.14    | -                    | -                        | 0                |      |
| CGCGCNCN  | 4334             | 4413             | 2216           | 14.23   | CGCGCGG   | 351              | 416              | 63             | 5.76    | -                    | -                        | 0                |      |
| NCACGTG   | 3001             | 2046             | 970            | 14.14   | CCACGTG   | 1257             | 932              | 284            | 9.09    | -                    | -                        | 0                |      |
| CTTYTYCTT | 2439             | 3612             | 1168           | 14.08   | CTTTTTCTT | 1150             | 1553             | 259            | 5.17    | -                    | -                        | 0                |      |
| RTGACGTN  | 1991             | 1630             | 594            | 13.45   | ATGACGTG  | 290              | 318              | 52             | 6.31    | -                    | -                        | 0                |      |
| GWNGATGA  | 2817             | 3082             | 1145           | 13.22   | GTTGATGA  | 547              | 527              | 73             | 4.16    | -                    | -                        | 0                |      |
| TCTCTYNT  | 5227             | 6595             | 3563           | 13.08   | TCTTCTT   | 1267             | 2070             | 354            | 4.30    | -                    | -                        | 0                |      |
| YTCTTYTT  | 6926             | 7900             | 5340           | 12.77   | TTCTTTTT  | 4523             | 5239             | 2453           | 9.14    | -                    | -                        | 0                |      |
| NTGACCTY  | 1581             | 1808             | 529            | 12.77   | ATGACCTT  | 253              | 300              | 45             | 6.11    | -                    | -                        | 0                |      |
| TGCGTCW   | 1887             | 2028             | 658            | 12.74   | TGCGTCA   | 633              | 583              | 103            | 4.06    | -                    | -                        | 0                |      |
| GATGAYRA  | 1955             | 2093             | 640            | 12.59   | GATGACAA  | 492              | 461              | 85             | 7.57    | M00229               | BHWWGTCATBVH             | 0.798            |      |
| CTYTTTTT  | 7172             | 7852             | 5480           | 12.58   | CTTTTTTT  | 5084             | 5558             | 2849           | 8.34    | -                    | -                        | 0                |      |
| ARGARGA   | 5381             | 6451             | 3553           | 12.55   | AAGAAGA   | 3375             | 4213             | 1609           | 10.49   | -                    | -                        | 0                |      |
| GTGTTTGC  | 560              | 515              | 149            | 12.48   | GTGTTTGC  | 560              | 515              | 149            | 12.48   | -                    | -                        | 0                |      |
| YCYTCT    | 6037             | 7508             | 4532           | 12.38   | TCCTTCT   | 2251             | 3337             | 906            | 6.39    | -                    | -                        | 0                |      |
| TACNGTAN  | 5101             | 6827             | 3545           | 12.16   | TACAGTAA  | 1040             | 1470             | 212            | 4.22    | -                    | -                        | 0                |      |
| GAGYRTCGT | 286              | 302              | 97             | 12.03   | GAGTGTCTG | 120              | 147              | 49             | 9.80    | -                    | -                        | 0                |      |
| GCNCGNG   | 5346             | 5057             | 2895           | 12.00   | GCTGCTG   | 974              | 990              | 182            | 4.09    | -                    | -                        | 0                |      |
| YCTGCGT   | 1678             | 1755             | 540            | 11.91   | TCTGCGT   | 1324             | 1490             | 409            | 11.54   | -                    | -                        | 0                |      |
| GCGYCTY   | 2791             | 3043             | 1129           | 11.71   | GCGCCTT   | 894              | 1012             | 176            | 4.96    | -                    | -                        | 0                |      |
| CCNCCNC   | 5845             | 6835             | 4047           | 11.41   | CCACCAC   | 1135             | 1309             | 268            | 5.35    | -                    | -                        | 0                |      |
| GANGATS   | 5722             | 6319             | 3684           | 11.39   | GAAGATC   | 1386             | 1459             | 336            | 7.26    | -                    | -                        | 0                |      |
| GGCCGNN   | 4437             | 4713             | 2303           | 11.32   | GGCGCCA   | 524              | 592              | 108            | 7.36    | -                    | -                        | 0                |      |
| TCGATYTT  | 3142             | 3118             | 1205           | 11.17   | TCGATTTT  | 2856             | 2817             | 1019           | 10.89   | -                    | -                        | 0                |      |
| TCTTTTNT  | 6386             | 7158             | 4505           | 11.12   | TCTTTTCT  | 1848             | 2511             | 580            | 5.98    | -                    | -                        | 0                |      |
| RTSAATCA  | 1942             | 1922             | 571            | 11.07   | ATCAATCA  | 765              | 696              | 150            | 10.02   | -                    | -                        | 0                |      |
| CNCCCWC   | 4160             | 5148             | 2366           | 11.02   | CACCCAC   | 679              | 713              | 139            | 5.66    | -                    | -                        | 0                |      |
| CTCNTCY   | 6859             | 8155             | 5439           | 10.98   | CTCATCT   | 1558             | 1860             | 414            | 4.83    | -                    | -                        | 0                |      |
| YTTTTTYT  | 7411             | 7392             | 5294           | 10.95   | CTTTTTTTT | 3105             | 3156             | 1048           | 5.31    | -                    | -                        | 0                |      |
| RRTTCGYAA | 862              | 834              | 199            | 10.95   | ATTTTCGAA | 380              | 346              | 69             | 7.64    | M00398               | RTTACGTAAY               | 0.824            |      |
| GGRNGGA   | 3833             | 4818             | 2038           | 10.94   | GGGAGGA   | 639              | 925              | 119            | 4.67    | -                    | -                        | 0                |      |
| ATGGAYGM  | 779              | 949              | 200            | 10.93   | ATGGATGC  | 171              | 220              | 34             | 5.66    | -                    | -                        | 0                |      |
| TCNCTYTC  | 4013             | 4953             | 2208           | 10.92   | TCACTTTC  | 1030             | 1078             | 210            | 5.81    | -                    | -                        | 0                |      |
| TTGCRTCAY | 342              | 348              | 95             | 10.88   | TTGCATCAT | 162              | 182              | 44             | 9.89    | -                    | -                        | 0                |      |
| CAAGGWCR  | 595              | 652              | 153            | 10.84   | CAAGGACA  | 213              | 236              | 39             | 5.95    | -                    | -                        | 0                |      |
| GANGWGG   | 4588             | 5280             | 2572           | 10.63   | GAAGTGG   | 972              | 1139             | 203            | 5.69    | -                    | -                        | 0                |      |
| CGCNCNG   | 4545             | 4644             | 2320           | 10.62   | CGCGACG   | 435              | 419              | 64             | 4.14    | -                    | -                        | 0                |      |
| GGAKCNG   | 3574             | 4036             | 1674           | 10.61   | GGATCCG   | 479              | 587              | 80             | 4.31    | -                    | -                        | 0                |      |
| TTYTYCTY  | 7849             | 8366             | 6261           | 10.58   | TTTTTCTT  | 5156             | 5483             | 2840           | 7.83    | -                    | -                        | 0                |      |
| GGRATGR   | 2646             | 3098             | 1044           | 10.55   | GGAATGG   | 893              | 1098             | 218            | 8.65    | -                    | -                        | 0                |      |
| RACYGGTT  | 914              | 1032             | 235            | 10.52   | AACCGGTT  | 259              | 297              | 65             | 9.36    | M00951               | WCYGGTTY                 | 0.914            |      |
| GAYGGAN   | 5074             | 5392             | 2869           | 10.46   | GATGGAT   | 1118             | 1267             | 256            | 6.99    | -                    | -                        | 0                |      |
| TTNCTYTY  | 8018             | 8510             | 6488           | 10.43   | TTTTTCTT  | 4756             | 4811             | 2308           | 6.21    | -                    | -                        | 0                |      |
| CASCTGN   | 5119             | 5568             | 2999           | 10.38   | CAGCTGA   | 1352             | 1577             | 346            | 6.28    | -                    | -                        | 0                |      |
| CTGGAAN   | 5785             | 6377             | 3716           | 10.29   | CTGGAAN   | 3337             | 3710             | 1318           | 4.70    | -                    | -                        | 0                |      |
| NCCACGT   | 2961             | 2443             | 1000           | 10.29   | GCCACGT   | 914              | 871              | 206            | 7.89    | -                    | -                        | 0                |      |
| TATGCWAAT | 366              | 288              | 66             | 10.27   | TATGCAAT  | 269              | 194              | 43             | 8.56    | -                    | -                        | 0                |      |
| GRATGGS   | 2152             | 2608             | 776            | 10.25   | GGATGGG   | 499              | 597              | 94             | 7.05    | -                    | -                        | 0                |      |
| NKCGTCG   | 3831             | 4385             | 1899           | 10.21   | GTCGTCG   | 700              | 979              | 156            | 6.19    | -                    | -                        | 0                |      |
| CGAYRCTCC | 325              | 374              | 120            | 10.15   | CGACACTCC | 142              | 180              | 51             | 5.49    | -                    | -                        | 0                |      |
| GCTGRRAA  | 2977             | 3341             | 1202           | 10.09   | GCTGAAAA  | 1996             | 2312             | 636            | 9.52    | -                    | -                        | 0                |      |
| AMGATSA   | 4703             | 4814             | 2419           | 10.08   | AAGATCA   | 1801             | 1609             | 403            | 5.49    | -                    | -                        | 0                |      |
| RGAARGA   | 5059             | 6050             | 3125           | 10.08   | AGAAAGA   | 2538             | 3076             | 879            | 5.45    | -                    | -                        | 0                |      |
| CACCTGY   | 1440             | 1453             | 409            | 9.99    | CACCTGC   | 697              | 657              | 143            | 7.24    | -                    | -                        | 0                |      |
| CGNYGGA   | 3772             | 4233             | 1809           | 9.98    | CGTGGGA   | 571              | 642              | 96             | 4.14    | -                    | -                        | 0                |      |
| NGATCCR   | 4215             | 4768             | 2203           | 9.98    | GGATCCA   | 728              | 946              | 148            | 5.00    | -                    | -                        | 0                |      |
| GAAYGGR   | 2941             | 3606             | 1274           | 9.96    | GAATGGG   | 796              | 1007             | 182            | 8.13    | -                    | -                        | 0                |      |
| CGNGGAN   | 5563             | 5824             | 3315           | 9.87    | CGTGGAG   | 690              | 633              | 116            | 4.78    | -                    | -                        | 0                |      |
| ATYGATNG  | 2709             | 2487             | 879            | 9.83    | ATTGATCG  | 341              | 312              | 54             | 6.23    | -                    | -                        | 0                |      |
| GAAGARNC  | 3040             | 3588             | 1299           | 9.79    | GAAGAATC  | 593              | 763              | 100            | 5.13    | -                    | -                        | 0                |      |
| GGATMNG   | 3349             | 3847             | 1501           | 9.77    | GGATATG   | 763              | 890              | 149            | 5.78    | -                    | -                        | 0                |      |
| ANGGAGR   | 5028             | 5903             | 3047           | 9.75    | AGGAGGG   | 439              | 547              | 67             | 4.40    | -                    | -                        | 0                |      |
| RNGATCG   | 3324             | 3736             | 1460           | 9.72    | GAGATCG   | 622              | 690              | 105            | 4.27    | -                    | -                        | 0                |      |
| SGAGANC   | 4630             | 4850             | 2413           | 9.69    | CGAGACC   | 1192             | 681              | 189            | 4.95    | -                    | -                        | 0                |      |
| TCTCNTT   | 7473             | 8206             | 5882           | 9.68    | TCTCATT   | 3521             | 3750             | 1403           | 4.14    | -                    | -                        | 0                |      |
| ATCRANGA  | 3244             | 3224             | 1244           | 9.61    | ATCAAGGA  | 381              | 385              | 66             | 7.14    | -                    | -                        | 0                |      |
| NGTYATCA  | 3067             | 3184             | 1186           | 9.53    | CGTCATCA  | 465              | 545              | 80             | 4.30    | M00229               | BHWWGTCATBVH             | 0.782            |      |
| GRWTGGG   | 2029             | 2491             | 698            | 9.42    | GGTTGGG   | 341              | 503              | 53             | 4.21    | -                    | -                        | 0                |      |
| YTNTCTT   | 5050             | 6161             | 3174           | 9.35    | TTGCTCTT  | 855              | 888              | 146            | 4.12    | -                    | -                        | 0                |      |

|           |       |       |       |      |           |      |      |      |      |        |                |       |
|-----------|-------|-------|-------|------|-----------|------|------|------|------|--------|----------------|-------|
| TTGTTTTY  | 3283  | 3148  | 1220  | 9.30 | TTGTTTAT  | 1335 | 1327 | 251  | 5.29 | M00475 | BBBTTGTTTACDHB | 0.944 |
| GRNATGG   | 4745  | 5176  | 2576  | 9.28 | GATATGG   | 861  | 917  | 171  | 6.32 | -      | -              | 0     |
| TKRCTCAT  | 1799  | 2023  | 550   | 9.27 | TTGCTCAT  | 677  | 812  | 121  | 5.06 | -      | -              | 0     |
| RNGAGCA   | 5574  | 5524  | 3156  | 9.20 | GAGAGCA   | 1141 | 1250 | 246  | 5.55 | -      | -              | 0     |
| GNCNCNC   | 4529  | 5722  | 2719  | 9.18 | GACCACC   | 611  | 765  | 132  | 6.42 | M01048 | BGGGDGGT       | 0.758 |
| YGAYATCA  | 1477  | 1734  | 413   | 9.11 | TGATATCA  | 635  | 802  | 106  | 5.46 | -      | -              | 0     |
| TCATNYC   | 7672  | 8016  | 5894  | 9.08 | TCATTTT   | 4134 | 3936 | 1690 | 4.12 | -      | -              | 0     |
| RGMAAGAA  | 2565  | 2796  | 883   | 9.01 | GGAAGAA   | 781  | 902  | 129  | 4.93 | -      | -              | 0     |
| CCTYTTY   | 7274  | 8203  | 5724  | 9.00 | CCTTTTT   | 4600 | 5352 | 2516 | 6.61 | -      | -              | 0     |
| CANNTGAC  | 3603  | 4448  | 1785  | 8.99 | CACATGAC  | 222  | 213  | 35   | 4.32 | -      | -              | 0     |
| TGCWCTTY  | 2550  | 2582  | 874   | 8.97 | TGCACTTT  | 888  | 852  | 168  | 6.25 | -      | -              | 0     |
| CATCATNAT | 862   | 973   | 192   | 8.91 | CATCATCAT | 439  | 455  | 77   | 6.31 | M00230 | VVDWATCATBHD   | 0.763 |
| TNTRTTT   | 10726 | 10549 | 10407 | 8.90 | TTTGTTT   | 6946 | 6129 | 4094 | 5.29 | -      | -              | 0     |
| TGGRATGR  | 1150  | 1311  | 282   | 8.82 | TGGGATGG  | 139  | 178  | 22   | 4.31 | -      | -              | 0     |
| GCGSTCN   | 2611  | 2857  | 963   | 8.81 | GCGGTCC   | 287  | 418  | 51   | 4.59 | -      | -              | 0     |
| GCWCCTY   | 4721  | 5036  | 2525  | 8.80 | GCACTTT   | 2013 | 1912 | 521  | 4.99 | -      | -              | 0     |
| TGKTAY    | 5377  | 5305  | 2931  | 8.78 | TGTTTAT   | 2871 | 2901 | 935  | 5.21 | M00475 | BBBTTGTTTACDHB | 0.865 |
| KYTCTTT   | 9037  | 9315  | 7867  | 8.77 | TTTCTTT   | 7062 | 7161 | 4829 | 5.96 | -      | -              | 0     |
| TACAAACTA | 258   | 204   | 40    | 8.76 | TACAAACTA | 258  | 204  | 40   | 8.76 | -      | -              | 0     |
| GNCWCWC   | 3825  | 5078  | 2109  | 8.71 | GTCCATC   | 723  | 874  | 144  | 4.71 | -      | -              | 0     |
| NAARGGA   | 6235  | 7024  | 4281  | 8.71 | AAAAGGA   | 2776 | 3273 | 1009 | 5.63 | -      | -              | 0     |
| GGATNCN   | 6113  | 7129  | 4282  | 8.68 | GGATTCT   | 1065 | 1690 | 270  | 5.05 | -      | -              | 0     |
| YATTACAC  | 570   | 459   | 100   | 8.67 | TATTACAC  | 362  | 275  | 50   | 6.41 | -      | -              | 0     |
| GANYGATG  | 1806  | 1904  | 512   | 8.63 | GATTGATG  | 415  | 395  | 68   | 7.01 | -      | -              | 0     |
| YGTGGR    | 2383  | 2365  | 765   | 8.62 | CGTGGGT   | 266  | 245  | 42   | 5.21 | -      | -              | 0     |
| GRTCAAGT  | 468   | 436   | 90    | 8.60 | GATCAAGT  | 311  | 261  | 48   | 6.40 | -      | -              | 0     |
| GGWSAAG   | 3115  | 3655  | 1324  | 8.60 | GGTCAAG   | 513  | 587  | 97   | 6.29 | -      | -              | 0     |
| RKGTGTG   | 3054  | 2896  | 1090  | 8.55 | ATGTGTG   | 1475 | 1286 | 302  | 5.21 | -      | -              | 0     |
| GCNCRTC   | 3793  | 3902  | 1687  | 8.54 | GCGCATC   | 390  | 461  | 82   | 7.41 | -      | -              | 0     |
| GACCCWCN  | 3428  | 4206  | 1638  | 8.53 | GACCACA   | 678  | 755  | 134  | 5.85 | M01049 | YGKGDGGT       | 0.759 |
| ATGATNSA  | 2948  | 3087  | 1079  | 8.50 | ATGATTGA  | 607  | 561  | 82   | 5.39 | M00230 | VVDWATCATBHD   | 0.849 |
| CGTAAATM  | 893   | 602   | 157   | 8.50 | CGTAAATC  | 618  | 428  | 111  | 8.24 | -      | -              | 0     |
| YTGCGKAC  | 627   | 630   | 143   | 8.49 | TTGCGGAC  | 200  | 230  | 44   | 5.57 | -      | -              | 0     |
| TGGRWTC   | 3259  | 4360  | 1587  | 8.42 | TGGAATC   | 1398 | 1904 | 356  | 4.06 | -      | -              | 0     |
| GGYCTYG   | 2257  | 1968  | 655   | 8.41 | GGTCTCG   | 1187 | 742  | 234  | 8.04 | -      | -              | 0     |
| TYTCWCIT  | 4832  | 5443  | 2709  | 8.38 | TTTCACTT  | 1777 | 1479 | 361  | 4.86 | -      | -              | 0     |
| TCGWAAM   | 7141  | 7611  | 5219  | 8.33 | TCGAAAA   | 5385 | 5905 | 3129 | 6.12 | -      | -              | 0     |
| TNNTTGTT  | 9325  | 8712  | 7598  | 8.30 | TTGTTGTT  | 1537 | 1405 | 304  | 4.86 | -      | -              | 0     |
| RGAAGR    | 4304  | 5051  | 2279  | 8.29 | AGAAGGT   | 1083 | 1413 | 232  | 4.20 | -      | -              | 0     |
| GRWCCAG   | 1877  | 2482  | 649   | 8.22 | GAACCCAG  | 663  | 844  | 121  | 4.25 | -      | -              | 0     |
| NMTAATCC  | 1891  | 1829  | 511   | 8.18 | ACTAATCC  | 186  | 193  | 28   | 4.56 | -      | -              | 0     |
| TCYGGAN   | 6118  | 7645  | 4540  | 8.16 | TCTGGAT   | 1239 | 1682 | 303  | 4.61 | -      | -              | 0     |
| TNTNAAA   | 10884 | 10875 | 10866 | 8.14 | TATAAAA   | 5243 | 4226 | 2237 | 5.27 | -      | -              | 0     |
| ATCRTNATC | 1127  | 1182  | 258   | 8.13 | ATCATAATC | 157  | 138  | 17   | 4.24 | -      | -              | 0     |
| GGACCRS   | 1110  | 1613  | 318   | 8.09 | GGACCCAG  | 362  | 530  | 79   | 7.25 | -      | -              | 0     |
| CMAGRAG   | 3721  | 4523  | 1835  | 8.08 | CCAGGAG   | 549  | 739  | 108  | 5.66 | -      | -              | 0     |
| TTTTTGRN  | 9674  | 9557  | 8580  | 8.04 | TTTTTGAT  | 3583 | 4063 | 1484 | 4.76 | -      | -              | 0     |
| AKAWGATA  | 1834  | 2069  | 506   | 8.03 | ATAAGATA  | 431  | 529  | 57   | 5.48 | M00230 | VVDWATCATBHD   | 0.75  |
| NAACTYAC  | 2959  | 2140  | 804   | 7.98 | AAACTCAC  | 826  | 715  | 118  | 4.31 | -      | -              | 0     |
| ATGAAKM   | 5945  | 5858  | 3469  | 7.95 | ATGAATA   | 2619 | 2230 | 681  | 4.80 | -      | -              | 0     |
| TYGRATTT  | 6046  | 5692  | 3405  | 7.95 | TTGAATTT  | 3848 | 3397 | 1341 | 4.43 | -      | -              | 0     |
| ACRAKGA   | 4250  | 4330  | 1973  | 7.93 | ACAATGA   | 1928 | 1643 | 416  | 4.48 | -      | -              | 0     |
| NTRTGAT   | 7685  | 7654  | 5617  | 7.91 | TTGTGAT   | 2556 | 2389 | 718  | 4.34 | -      | -              | 0     |
| GGRTTSG   | 1888  | 2343  | 613   | 7.89 | GGGTTCC   | 358  | 452  | 58   | 4.37 | -      | -              | 0     |
| GARGANA   | 8143  | 8727  | 6687  | 7.88 | GAAGAAA   | 4366 | 4596 | 2023 | 4.93 | -      | -              | 0     |
| CGRCKC    | 1188  | 1449  | 317   | 7.86 | CGACCCG   | 285  | 385  | 49   | 4.87 | -      | -              | 0     |
| TTTNAAMA  | 10363 | 9692  | 9277  | 7.85 | TTTCAAAA  | 6021 | 5508 | 3195 | 4.67 | -      | -              | 0     |
| TAAYTTATT | 1325  | 724   | 175   | 7.85 | TAATTTATT | 1086 | 589  | 120  | 6.44 | -      | -              | 0     |
| GNAYGAT   | 5071  | 5176  | 2694  | 7.82 | GCATGAT   | 743  | 689  | 115  | 4.28 | M00230 | VVDWATCATBHD   | 0.788 |
| ATGGMWC   | 2951  | 3118  | 1109  | 7.82 | ATGGCTC   | 835  | 906  | 163  | 5.18 | -      | -              | 0     |
| ATCNWATC  | 2878  | 3040  | 1039  | 7.80 | ATCAAATC  | 825  | 744  | 116  | 4.37 | -      | -              | 0     |
| GNGKCC    | 1592  | 2447  | 545   | 7.74 | GTGTGCC   | 461  | 608  | 83   | 4.91 | -      | -              | 0     |
| TGTAYATAN | 1126  | 760   | 176   | 7.73 | TGTACATAA | 135  | 123  | 18   | 5.26 | -      | -              | 0     |
| YTAAGGC   | 719   | 594   | 123   | 7.71 | TTAAAGGC  | 655  | 518  | 101  | 6.86 | -      | -              | 0     |
| NAACANCA  | 5531  | 5491  | 3061  | 7.62 | CAACAACA  | 763  | 834  | 133  | 4.94 | -      | -              | 0     |
| ANTACAW   | 8456  | 7604  | 6093  | 7.62 | ACTACAA   | 1821 | 1763 | 432  | 5.02 | -      | -              | 0     |
| ATYRATGAG | 514   | 472   | 88    | 7.60 | ATTGATGAG | 174  | 144  | 25   | 5.58 | -      | -              | 0     |
| TTNCAGGA  | 2076  | 2663  | 712   | 7.56 | TTTCAGGA  | 1118 | 1446 | 248  | 4.99 | -      | -              | 0     |
| GGTCMCT   | 857   | 1179  | 217   | 7.53 | GGTCACT   | 597  | 676  | 120  | 6.07 | -      | -              | 0     |
| GARCAKGT  | 991   | 952   | 204   | 7.39 | GAACAGGT  | 220  | 217  | 34   | 5.01 | -      | -              | 0     |
| CCASGWC   | 1810  | 2106  | 559   | 7.39 | CCAGGAC   | 368  | 449  | 64   | 4.83 | -      | -              | 0     |
| ANACAACR  | 3174  | 3181  | 1152  | 7.38 | AGACAACA  | 391  | 491  | 57   | 4.65 | M00475 | BBBTTGTTTACDHB | 0.768 |
| NAATWAA   | 10655 | 9965  | 9780  | 7.36 | CAATAAA   | 4131 | 3118 | 1354 | 4.52 | -      | -              | 0     |
| CCWTGRC   | 1850  | 2230  | 590   | 7.34 | CCTTGAC   | 615  | 694  | 112  | 4.62 | -      | -              | 0     |
| TGSCACG   | 1261  | 1197  | 293   | 7.34 | TGGCACG   | 504  | 466  | 76   | 4.47 | -      | -              | 0     |
| CMYATGT   | 3138  | 2885  | 1098  | 7.34 | CACATGT   | 1107 | 1086 | 214  | 4.37 | -      | -              | 0     |
| ACRYAAACA | 596   | 536   | 104   | 7.33 | ACATAAACA | 156  | 146  | 18   | 5.03 | M00475 | BBBTTGTTTACDHB | 0.763 |
| RAARAAC   | 9625  | 9400  | 8398  | 7.27 | AAAGAAC   | 2069 | 2166 | 538  | 4.22 | -      | -              | 0     |
| YTCCCAN   | 7015  | 7465  | 5057  | 7.21 | TTCCCAT   | 2207 | 2384 | 664  | 4.50 | -      | -              | 0     |
| YGTTRTTG  | 1716  | 1645  | 420   | 7.20 | TGTTGTTG  | 795  | 756  | 128  | 5.09 | -      | -              | 0     |
| TTTTWTG   | 9735  | 9439  | 8522  | 7.18 | TTTTTTT   | 9147 | 8845 | 7545 | 7.12 | -      | -              | 0     |
| ATCARTRT  | 2230  | 1744  | 517   | 7.13 | ATCAATAT  | 1039 | 687  | 120  | 4.22 | -      | -              | 0     |
| CATYTGNA  | 4437  | 4178  | 1961  | 7.12 | CATCTGAA  | 909  | 1060 | 167  | 4.44 | -      | -              | 0     |
| GACTAYNA  | 1658  | 1667  | 411   | 7.09 | GACTACAA  | 439  | 435  | 64   | 5.06 | -      | -              | 0     |
| TTYCATT   | 7947  | 7288  | 5519  | 7.08 | TTTCATT   | 6433 | 5579 | 3482 | 4.87 | -      | -              | 0     |
| TAWTTATTN | 4460  | 2665  | 1284  | 7.05 | TATTTATTG | 513  | 301  | 48   | 5.37 | -      | -              | 0     |
| ATAAAGS   | 933   | 914   | 166   | 7.05 | ATAAAGG   | 444  | 512  | 64   | 5.75 | -      | -              | 0     |
| TTTWTAW   | 10545 | 9940  | 9660  | 6.90 | TTTTTAA   | 9024 | 7059 | 5953 | 4.32 | -      | -              | 0     |
| ATCCKMITA | 229   | 239   | 41    | 6.85 | ATCCGATTA | 91   | 87   | 15   | 4.23 | -      | -              | 0     |



|           |       |       |      |      |             |      |      |      |      |        |            |       |
|-----------|-------|-------|------|------|-------------|------|------|------|------|--------|------------|-------|
| CCWGGAGW  | 593   | 707   | 130  | 6.84 | CCAGGAGA    | 176  | 278  | 39   | 5.72 | -      | -          | 0     |
| TTACRYAA  | 1515  | 1025  | 261  | 6.79 | TTACACAA    | 547  | 406  | 66   | 4.88 | M00398 | RTTACGTAAY | 0.936 |
| TCRCACCT  | 384   | 441   | 82   | 6.61 | TCACACCT    | 280  | 316  | 53   | 5.40 | -      | -          | 0     |
| TYATYAAGG | 247   | 217   | 42   | 6.61 | TCATCAAGG   | 87   | 80   | 18   | 4.12 | -      | -          | 0     |
| GRTGGNAT  | 1544  | 1656  | 384  | 6.58 | GGTGGCAT    | 132  | 145  | 23   | 4.37 | -      | -          | 0     |
| TATRMATA  | 2773  | 1824  | 620  | 6.57 | TATAATA     | 1390 | 832  | 180  | 5.10 | -      | -          | 0     |
| TGGANRT   | 7500  | 7345  | 5257 | 6.50 | TGGAAT      | 4070 | 3703 | 1558 | 4.18 | -      | -          | 0     |
| CTAARGAGG | 43    | 63    | 16   | 6.50 | CTAAAGAGG   | 36   | 48   | 14   | 6.45 | -      | -          | 0     |
| RCATRATC  | 905   | 819   | 159  | 6.48 | ACATAATC    | 355  | 297  | 38   | 4.08 | -      | -          | 0     |
| ACCTTRR   | 2324  | 2312  | 695  | 6.37 | ACCTTGG     | 439  | 499  | 81   | 5.89 | -      | -          | 0     |
| YRATTAG   | 3671  | 3471  | 1398 | 6.32 | CAATTAG     | 1276 | 1261 | 257  | 5.11 | -      | -          | 0     |
| GARAWTT   | 10133 | 9820  | 9188 | 6.32 | GAGATT      | 2774 | 2867 | 895  | 4.82 | -      | -          | 0     |
| CAWTYTT   | 10457 | 10156 | 9784 | 6.32 | CATTTTT     | 8565 | 8020 | 6412 | 4.45 | -      | -          | 0     |
| ARTCAYA   | 5034  | 4858  | 2486 | 6.26 | AATCACA     | 2130 | 2081 | 541  | 4.10 | -      | -          | 0     |
| TTYRGATGA | 751   | 916   | 143  | 6.21 | TTCAGATGA   | 300  | 422  | 43   | 4.31 | -      | -          | 0     |
| GAATMNAT  | 4050  | 3826  | 1626 | 6.16 | GAATACAT    | 533  | 464  | 61   | 4.07 | -      | -          | 0     |
| CCRNAAA   | 9536  | 9640  | 8516 | 6.14 | CCAAAA      | 5963 | 5870 | 3390 | 4.58 | -      | -          | 0     |
| GTGTCRKT  | 977   | 1171  | 217  | 6.11 | GTGTCGTT    | 299  | 438  | 53   | 4.83 | -      | -          | 0     |
| GTTGGGTTT | 43    | 61    | 18   | 6.09 | GTTGGGTTT   | 43   | 61   | 18   | 6.09 | -      | -          | 0     |
| RTWTTTA   | 10157 | 9290  | 8726 | 6.00 | ATTTTTA     | 8389 | 7079 | 5566 | 4.09 | -      | -          | 0     |
| GMTAAAAA  | 552   | 518   | 70   | 5.93 | GTCAAAAA    | 203  | 237  | 23   | 4.37 | -      | -          | 0     |
| AGGCCGYT  | 28    | 40    | 15   | 5.93 | AGGCCGTT    | 25   | 30   | 14   | 5.38 | -      | -          | 0     |
| CGYAART   | 3366  | 2671  | 1056 | 5.90 | CGTAAAT     | 1541 | 1090 | 279  | 5.24 | -      | -          | 0     |
| CCCTWAAGA | 54    | 60    | 17   | 5.78 | CCCTAAAGA   | 40   | 44   | 15   | 5.74 | -      | -          | 0     |
| ATAAAWAGA | 640   | 581   | 77   | 5.74 | ATAAATAGA   | 231  | 181  | 18   | 4.30 | -      | -          | 0     |
| RCTWTACAC | 194   | 184   | 34   | 5.73 | ACTTTACAC   | 100  | 80   | 17   | 5.01 | -      | -          | 0     |
| CAAANSA   | 8737  | 8664  | 7073 | 5.72 | CAAATCA     | 2492 | 2359 | 696  | 4.29 | -      | -          | 0     |
| CTTRGGG   | 768   | 735   | 141  | 5.67 | CTTGGCG     | 578  | 568  | 91   | 4.13 | -      | -          | 0     |
| NACASTT   | 8125  | 7741  | 5944 | 5.63 | AACACTT     | 2398 | 2152 | 625  | 4.32 | -      | -          | 0     |
| ATTACCTR  | 512   | 411   | 69   | 5.60 | ATTACCTG    | 289  | 222  | 36   | 4.69 | -      | -          | 0     |
| TTAYGATTC | 226   | 273   | 33   | 5.59 | TTATGATTC   | 160  | 196  | 19   | 4.14 | -      | -          | 0     |
| TCATSRAAT | 963   | 982   | 168  | 5.58 | TCATCAAAT   | 404  | 317  | 45   | 4.75 | -      | -          | 0     |
| MAKGACC   | 2033  | 2822  | 707  | 5.52 | CAGGACC     | 322  | 424  | 53   | 4.13 | -      | -          | 0     |
| CAAASTACA | 434   | 434   | 64   | 5.50 | CAAACACTACA | 321  | 295  | 44   | 5.26 | -      | -          | 0     |
| STTGWTGAT | 632   | 653   | 99   | 5.37 | CTTGATGAT   | 123  | 132  | 16   | 4.15 | -      | -          | 0     |
| TACGAGTM  | 222   | 200   | 34   | 5.33 | TACGAGTC    | 81   | 87   | 14   | 4.13 | -      | -          | 0     |
| GTAAWYATG | 334   | 326   | 44   | 5.33 | GTAACATG    | 91   | 86   | 13   | 4.26 | -      | -          | 0     |
| GGMRAGGT  | 553   | 553   | 92   | 5.31 | GGAAGGT     | 252  | 210  | 32   | 4.37 | -      | -          | 0     |
| RANGAACAT | 1130  | 1155  | 207  | 5.13 | AAGGAACAT   | 137  | 182  | 19   | 4.57 | -      | -          | 0     |
| GWACCWGT  | 630   | 745   | 116  | 5.09 | GTACCAGT    | 122  | 154  | 22   | 4.43 | M00951 | WCYGGTTY   | 0.768 |
| CACATGATT | 114   | 118   | 19   | 5.08 | CACATGATT   | 114  | 118  | 19   | 5.08 | -      | -          | 0     |
| CAAGTTCGA | 75    | 113   | 17   | 5.02 | CAAGTTCGA   | 75   | 113  | 17   | 5.02 | -      | -          | 0     |
| GGSCGTTGG | 39    | 48    | 15   | 4.86 | GGCCGTTGG   | 32   | 35   | 14   | 4.50 | -      | -          | 0     |
| GGCCTARM  | 737   | 859   | 137  | 4.85 | GGCCTAAA    | 363  | 391  | 55   | 4.17 | -      | -          | 0     |
| CTTATGACA | 56    | 72    | 11   | 4.79 | CTTATGACA   | 56   | 72   | 11   | 4.79 | -      | -          | 0     |
| CCAAAGGG  | 104   | 134   | 21   | 4.69 | CCAAAGGG    | 104  | 134  | 21   | 4.69 | -      | -          | 0     |
| TWCAKGTA  | 1511  | 1376  | 298  | 4.55 | TTCATGTA    | 518  | 468  | 61   | 4.07 | -      | -          | 0     |
| ACGATAAAC | 76    | 72    | 12   | 4.54 | ACGATAAAC   | 76   | 72   | 12   | 4.54 | -      | -          | 0     |
| GGGTCGCTT | 48    | 45    | 17   | 4.53 | GGGTCGCTT   | 44   | 34   | 16   | 4.15 | -      | -          | 0     |
| GAGCCAATG | 63    | 75    | 18   | 4.52 | GAGCCAATG   | 63   | 75   | 18   | 4.52 | -      | -          | 0     |
| TTTGATCTA | 505   | 390   | 55   | 4.48 | TTTGATCTA   | 505  | 390  | 55   | 4.48 | -      | -          | 0     |
| AGTGAAAGT | 131   | 157   | 18   | 4.47 | AGTGAAAGT   | 131  | 157  | 18   | 4.47 | -      | -          | 0     |
| TATCAGWGA | 257   | 333   | 35   | 4.34 | TATCAGTGA   | 166  | 190  | 22   | 4.06 | -      | -          | 0     |
| AGAAGCAAT | 152   | 157   | 19   | 4.03 | AGAAGCAAT   | 152  | 157  | 19   | 4.03 | -      | -          | 0     |

**Table S7** Clusters of motifs discovered in the promoter regions of *D. melanogaster*

| Motif     | Expanded motif   |                  |                |         | Motif     | K-mer            |                  |                |         | Match to known motif |                          |                  |                  |
|-----------|------------------|------------------|----------------|---------|-----------|------------------|------------------|----------------|---------|----------------------|--------------------------|------------------|------------------|
|           | Num in species A | Num in species B | Num in A and B | Z-score |           | Num in species A | Num in species B | Num in A and B | Z-score | Transfac motif ID    | Transfac motif consensus | Similarity score | Name             |
| CAGCTGWT  | 1974             | 2102             | 754            | 18.19   | CAGCTGTT  | 1198             | 1326             | 372            | 14.45   | M00044               | VBVABBGTGHTDVBW          | 0.779            | Sn               |
| RCACRCAC  | 2600             | 3335             | 1192           | 16.51   | GCACACAC  | 1049             | 1267             | 262            | 8.89    | -                    | -                        | 0                | -                |
| STATAWAAG | 732              | 685              | 230            | 16.49   | CTATAAAAG | 254              | 272              | 73             | 10.11   | M00252               | BTATAWAUVBVVVB           | 0.913            | TATA             |
| ATTTGCAT  | 1397             | 1371             | 425            | 15.99   | ATTTGCAT  | 1397             | 1371             | 425            | 15.99   | -                    | -                        | 0                | -                |
| NATCGRTA  | 3532             | 3859             | 1634           | 15.01   | TATCGATA  | 1742             | 1925             | 559            | 13.76   | M00488               | VVBTATCGATWDDH           | 0.892            | DREF             |
| TCCTCNTC  | 2247             | 2103             | 765            | 14.62   | TCCTCCTC  | 998              | 961              | 235            | 9.85    | -                    | -                        | 0                | -                |
| NWGATAAG  | 2886             | 2569             | 1019           | 14.04   | CTGATAAG  | 545              | 566              | 110            | 8.60    | M00487               | KNMTTATCVNH              | 0.915            | mtTFA            |
| CACGTGYN  | 1550             | 1534             | 473            | 13.68   | CACGTGTT  | 213              | 210              | 37             | 6.03    | JASPAR_MA0086        | CAGGTG                   | 0.762            | sna              |
| YAATTAGN  | 3322             | 2947             | 1258           | 13.63   | CAATTAGC  | 560              | 492              | 115            | 9.87    | M00696               | YCAATTA                  | 0.85             | En               |
| TGACGTCA  | 327              | 417              | 102            | 13.59   | TGACGTCA  | 327              | 417              | 102            | 13.59   | -                    | -                        | 0                | -                |
| TTRCATAA  | 1524             | 1402             | 425            | 13.37   | TTGCATAA  | 846              | 778              | 203            | 12.67   | -                    | -                        | 0                | -                |
| STCCTYG   | 4727             | 3902             | 2108           | 13.17   | CTCCTCG   | 1992             | 1558             | 521            | 9.38    | -                    | -                        | 0                | -                |
| TTGTTGNY  | 5138             | 5457             | 2903           | 13.10   | TTGTTGTT  | 1857             | 2154             | 540            | 8.47    | -                    | -                        | 0                | -                |
| CTYCTTGN  | 3505             | 2950             | 1313           | 12.76   | CTCCTTGT  | 514              | 428              | 94             | 7.14    | -                    | -                        | 0                | -                |
| CAATTARN  | 4547             | 4213             | 2114           | 12.67   | CAATTA    | 1582             | 1414             | 372            | 8.76    | M00696               | YCAATTA                  | 0.926            | En               |
| YNACCTTG  | 2072             | 1699             | 598            | 12.66   | TCACCTTG  | 444              | 337              | 63             | 4.77    | -                    | -                        | 0                | -                |
| CATAAATY  | 1746             | 1634             | 499            | 12.59   | CATAAATT  | 1190             | 1081             | 269            | 9.86    | -                    | -                        | 0                | -                |
| TGYTYGTY  | 3605             | 4647             | 1862           | 12.59   | TGTTGTTG  | 1417             | 1793             | 412            | 10.14   | -                    | -                        | 0                | -                |
| AGWGARAG  | 1713             | 3096             | 740            | 12.52   | AGAGAGAG  | 683              | 1816             | 232            | 9.34    | -                    | -                        | 0                | -                |
| YTTAATTR  | 4413             | 3479             | 1763           | 12.25   | TTTAATTG  | 1619             | 1397             | 378            | 8.95    | M00020               | VVDVYAATTAAG             | 0.938            | Ftz              |
| AGAGAGNG  | 1436             | 2855             | 606            | 12.23   | AGAGAGCG  | 574              | 863              | 106            | 4.23    | M00723               | VSWGAGMGHVR              | 0.794            | GAGA             |
| NGTCCTK   | 5681             | 5079             | 2996           | 12.17   | TGTCCTT   | 1620             | 1301             | 346            | 6.43    | M00009               | GGTCCTGC                 | 0.818            | Ttk              |
| CCTYCWGT  | 1590             | 1209             | 406            | 12.13   | CCTTCATG  | 311              | 244              | 54             | 6.63    | -                    | -                        | 0                | -                |
| TGATTGAY  | 928              | 1055             | 238            | 12.10   | TGATTGAT  | 662              | 765              | 156            | 11.34   | -                    | -                        | 0                | -                |
| ACTYACC   | 2458             | 1792             | 692            | 11.96   | ACTCAC    | 1403             | 1023             | 275            | 6.74    | -                    | -                        | 0                | -                |
| TCCTYGNT  | 2995             | 2536             | 1005           | 11.93   | TCCTCGAT  | 524              | 415              | 71             | 4.73    | -                    | -                        | 0                | -                |
| RTGANTCA  | 2148             | 2193             | 689            | 11.92   | ATGACTCA  | 232              | 242              | 35             | 5.22    | M00199               | VTGASTCAB                | 0.946            | AP-1             |
| GYCATNAA  | 3291             | 3111             | 1267           | 11.90   | GCCATAAA  | 848              | 853              | 195            | 10.24   | M00090               | VBNTWDAYKVCNVB           | 0.939            | Abd-B            |
| ACYTGTG   | 1057             | 1009             | 266            | 11.86   | ACCTGTTG  | 413              | 411              | 94             | 9.63    | M00044               | VBVABBGTGHTDVBW          | 0.779            | Sn               |
| CNTCATCN  | 4566             | 4460             | 2205           | 11.70   | CATCATCA  | 794              | 895              | 168            | 7.88    | -                    | -                        | 0                | -                |
| CASNTCCT  | 3291             | 2474             | 1079           | 11.64   | CAGCTCCT  | 935              | 728              | 173            | 6.73    | -                    | -                        | 0                | -                |
| CTCCTCNT  | 2035             | 1978             | 633            | 11.60   | CTCCTCCT  | 1036             | 1024             | 227            | 7.91    | -                    | -                        | 0                | -                |
| NNAATAAA  | 9795             | 9255             | 8197           | 11.56   | ACAATAAA  | 1481             | 1470             | 320            | 5.49    | M00266               | HWNVRTAAATABHNBV         | 0.788            | Croc             |
| RNCATGTG  | 2249             | 2122             | 711            | 11.50   | GACATGTG  | 271              | 261              | 45             | 5.72    | JASPAR_MA0086        | CAGGTG                   | 0.762            | sna              |
| CGATCNN   | 8196             | 7713             | 5910           | 11.43   | CGATCTT   | 1194             | 924              | 199            | 4.20    | -                    | -                        | 0                | -                |
| CCTYCTTS  | 1868             | 1581             | 514            | 11.38   | CCTTCTTC  | 633              | 560              | 96             | 4.55    | -                    | -                        | 0                | -                |
| STNCTCCA  | 3779             | 3253             | 1475           | 11.32   | CTGCTCCA  | 947              | 717              | 164            | 6.39    | -                    | -                        | 0                | -                |
| CTYCTCCW  | 2767             | 2634             | 976            | 11.29   | CTCCTCCA  | 995              | 864              | 196            | 6.97    | -                    | -                        | 0                | -                |
| YACCTGN   | 5939             | 5406             | 3262           | 11.25   | TACCTGC   | 814              | 747              | 151            | 5.41    | JASPAR_MA0086        | CAGGTG                   | 0.941            | sna              |
| TNCTCCTK  | 3432             | 3121             | 1304           | 11.24   | TGCTCCTT  | 677              | 511              | 110            | 6.53    | -                    | -                        | 0                | -                |
| WTGCATAA  | 1402             | 1227             | 341            | 11.21   | ATGCATAA  | 612              | 495              | 85             | 5.21    | -                    | -                        | 0                | -                |
| KGYTGCTG  | 2999             | 3862             | 1352           | 11.20   | GGCTGCTG  | 698              | 959              | 131            | 4.66    | -                    | -                        | 0                | -                |
| NNTCCTG   | 8828             | 8351             | 6783           | 11.16   | CATCCTG   | 1516             | 1008             | 262            | 4.24    | M00009               | GGTCCTGC                 | 0.845            | Ttk              |
| GCGYGCN   | 4774             | 4950             | 2497           | 11.04   | GCGCGCC   | 756              | 771              | 130            | 5.29    | M00067               | VVBBCACGCKVSHB           | 0.825            | Hairy            |
| RCCTTGN   | 2236             | 2218             | 730            | 11.03   | GCCTTGCC  | 504              | 527              | 85             | 5.18    | -                    | -                        | 0                | -                |
| CTNACCTK  | 1964             | 1690             | 539            | 11.02   | CTCACCTG  | 446              | 315              | 70             | 6.35    | -                    | -                        | 0                | -                |
| AACCGT    | 1412             | 1358             | 372            | 10.96   | AACCGT    | 333              | 353              | 72             | 8.79    | M00951               | WCYGGTTY                 | 0.854            | Grainyhead/Elf-1 |
| TYRTCCTC  | 1529             | 1371             | 400            | 10.95   | TTGTCCTC  | 430              | 356              | 62             | 4.69    | -                    | -                        | 0                | -                |
| CATGWCCW  | 1368             | 1156             | 337            | 10.93   | CATGTCCA  | 510              | 502              | 106            | 8.31    | -                    | -                        | 0                | -                |
| CANCTSCT  | 3972             | 3508             | 1616           | 10.85   | CATCTCCT  | 411              | 389              | 63             | 4.68    | -                    | -                        | 0                | -                |
| CTYSTCCT  | 2250             | 2090             | 699            | 10.82   | CTTCTCCT  | 755              | 672              | 123            | 5.30    | -                    | -                        | 0                | -                |
| SCGCATGN  | 1667             | 1549             | 461            | 10.70   | GCGCATGC  | 337              | 311              | 59             | 5.72    | -                    | -                        | 0                | -                |
| CGYATRCG  | 1099             | 1025             | 271            | 10.63   | CGCATGCG  | 320              | 273              | 63             | 7.26    | -                    | -                        | 0                | -                |
| CRTAATTR  | 1861             | 1653             | 493            | 10.62   | CATAATTA  | 776              | 693              | 135            | 6.97    | M00020               | VVDVYAATTAAG             | 0.84             | Ftz              |
| MAACAAM   | 5376             | 5576             | 3007           | 10.62   | AAAACAAA  | 3363             | 3287             | 1228           | 7.55    | M00093               | DVDDAAACWARDHBH          | 0.773            | BR-C             |
| SNTGCCG   | 5984             | 5366             | 3252           | 10.61   | GCTGCGC   | 1717             | 1462             | 398            | 6.49    | -                    | -                        | 0                | -                |
| CCNSCCA   | 6781             | 7067             | 4599           | 10.58   | CCACCCA   | 1723             | 1619             | 401            | 4.53    | -                    | -                        | 0                | -                |
| TGACMTTG  | 762              | 675              | 166            | 10.56   | TGACATTG  | 441              | 421              | 84             | 8.45    | -                    | -                        | 0                | -                |
| TCNTYGTC  | 2970             | 3211             | 1170           | 10.55   | TCATTGTC  | 378              | 453              | 62             | 5.39    | -                    | -                        | 0                | -                |
| TGGCCNAR  | 3998             | 3370             | 1564           | 10.54   | TGGCCGAG  | 527              | 506              | 100            | 7.14    | -                    | -                        | 0                | -                |
| TSNTCCAG  | 3222             | 2839             | 1147           | 10.46   | TCCTCCAG  | 816              | 613              | 131            | 5.21    | -                    | -                        | 0                | -                |
| GTGGCCAN  | 2692             | 1983             | 779            | 10.46   | GTGGCCAT  | 633              | 511              | 102            | 5.05    | -                    | -                        | 0                | -                |
| ATYGATTTY | 1430             | 1232             | 341            | 10.45   | ATTGATTTT | 579              | 547              | 110            | 9.35    | -                    | -                        | 0                | -                |
| RCCTTSTC  | 1150             | 1147             | 291            | 10.42   | GCCTTCTC  | 375              | 385              | 63             | 5.11    | -                    | -                        | 0                | -                |
| CAAGGNCR  | 2243             | 2119             | 697            | 10.39   | CAAGGCCA  | 496              | 444              | 76             | 5.13    | -                    | -                        | 0                | -                |
| TGMTGNAG  | 3353             | 3203             | 1282           | 10.39   | TGCTGGAG  | 628              | 611              | 108            | 6.15    | -                    | -                        | 0                | -                |
| CCWGCNG   | 7792             | 7532             | 5508           | 10.38   | CCAGCAG   | 2583             | 2843             | 854            | 4.93    | -                    | -                        | 0                | -                |
| GCNGCNGC  | 6477             | 7479             | 4596           | 10.35   | GCAGCTGC  | 1260             | 1347             | 294            | 6.78    | M00171               | SVGCYGBYNGCVKV           | 0.785            | Adf-1            |
| TSWCCTC   | 3873             | 3716             | 1648           | 10.32   | TCACCTC   | 1043             | 915              | 202            | 5.81    | -                    | -                        | 0                | -                |
| GNTGCWGC  | 4477             | 5049             | 2358           | 10.28   | GCTGCAGC  | 1041             | 1239             | 215            | 4.59    | -                    | -                        | 0                | -                |
| TGCRTCAY  | 1047             | 1048             | 255            | 10.25   | TGCATCAC  | 283              | 252              | 40             | 4.36    | -                    | -                        | 0                | -                |
| YGACANTG  | 2915             | 2513             | 965            | 10.25   | TGCACTTG  | 779              | 689              | 141            | 6.72    | M00060               | VHRRCAGGTGYVV            | 0.819            | Sn               |
| CAYATGY   | 5182             | 5532             | 2900           | 10.19   | CATATGT   | 2304             | 2895             | 774            | 5.87    | -                    | -                        | 0                | -                |
| AARTGCAN  | 5410             | 5120             | 2813           | 10.15   | AAATGCAT  | 1169             | 1130             | 241            | 7.59    | -                    | -                        | 0                | -                |
| GCWNCTGC  | 4525             | 4911             | 2329           | 10.13   | GCTCCTGC  | 685              | 649              | 105            | 4.05    | M00009               | GGTCCTGC                 | 0.751            | Ttk              |
| CTGYTSC   | 6290             | 6747             | 4103           | 10.13   | CTGCTGC   | 3271             | 3974             | 1423           | 7.58    | -                    | -                        | 0                | -                |
| CTYCTTNA  | 3210             | 2630             | 1051           | 10.12   | CTTCTTCA  | 807              | 625              | 130            | 6.46    | -                    | -                        | 0                | -                |
| ATGTANRT  | 4865             | 5092             | 2517           | 10.10   | ATGTACAT  | 1246             | 1839             | 315            | 5.89    | -                    | -                        | 0                | -                |
| TCNCKCTC  | 2436             | 3711             | 1078           | 10.07   | TCGCGCTC  | 303              | 301              | 46             | 4.41    | M00723               | VSWGAGMGHVR              | 0.879            | GAGA             |
| TGCAMYTT  | 2854             | 2463             | 904            | 10.06   | TGCACTTT  | 1018             | 844              | 163            | 5.02    | -                    | -                        | 0                | -                |
| ATGAYSTC  | 1032             | 960              | 234            | 10.05   | ATGATCTC  | 330              | 308              | 45             | 4.67    | -                    | -                        | 0                | -                |
| CWGCTCC   | 4150             | 3854             | 1789           | 9.96    | CTGCTCC   | 2592             | 2259             | 761            | 7.33    | -                    | -                        | 0                | -                |

|           |      |      |      |      |           |      |      |      |      |               |                |       |                |
|-----------|------|------|------|------|-----------|------|------|------|------|---------------|----------------|-------|----------------|
| NTGACNCA  | 3502 | 3213 | 1331 | 9.94 | ATGACACA  | 261  | 290  | 38   | 4.86 | M00199        | VTGASTCAB      | 0.86  | AP-1           |
| CATGWCMA  | 1392 | 1347 | 354  | 9.92 | CATGTCAA  | 268  | 338  | 40   | 4.62 | -             | -              | 0     | -              |
| GATSANC   | 6376 | 5741 | 3612 | 9.90 | GATGAGC   | 1456 | 1226 | 296  | 5.19 | -             | -              | 0     | -              |
| CRMTMTT   | 1355 | 1169 | 311  | 9.88 | CGTACTTG  | 294  | 234  | 50   | 6.58 | M00696        | YCAATTA        | 0.786 | En             |
| GMCAINTT  | 3462 | 3282 | 1316 | 9.88 | GCCATTTT  | 949  | 873  | 173  | 6.30 | -             | -              | 0     | -              |
| AAINTRAAA | 8519 | 7853 | 6177 | 9.86 | AATTGAAA  | 1924 | 1708 | 466  | 7.28 | -             | -              | 0     | -              |
| TGTANRTA  | 4814 | 4991 | 2447 | 9.85 | TGTACATA  | 1284 | 1803 | 325  | 6.37 | -             | -              | 0     | -              |
| GCNGCCAT  | 1781 | 1952 | 543  | 9.82 | GCTGCCAT  | 609  | 666  | 107  | 5.30 | -             | -              | 0     | -              |
| TATAAATAG | 322  | 324  | 69   | 9.80 | TATAAATAG | 322  | 324  | 69   | 9.80 | M00252        | BTATAWAWVBVVBB | 0.829 | TATA           |
| GMTCCSTC  | 4131 | 3656 | 1709 | 9.80 | GATCCTC   | 1197 | 851  | 194  | 4.01 | -             | -              | 0     | -              |
| ACYTTSAC  | 1361 | 1243 | 324  | 9.79 | ACTTTTAC  | 487  | 409  | 84   | 8.12 | -             | -              | 0     | -              |
| NNGCGC    | 6472 | 6479 | 4059 | 9.78 | CTCGCGC   | 795  | 801  | 142  | 4.40 | -             | -              | 0     | -              |
| SKCCAGC   | 5599 | 5368 | 3046 | 9.78 | GTCCAGC   | 1518 | 1440 | 336  | 4.49 | -             | -              | 0     | -              |
| KTCTTCWT  | 2328 | 2272 | 706  | 9.77 | TTCTTCAT  | 682  | 603  | 94   | 4.64 | -             | -              | 0     | -              |
| NAWGGCCA  | 3785 | 3388 | 1478 | 9.77 | GAAGGCCA  | 446  | 429  | 69   | 4.50 | -             | -              | 0     | -              |
| AAAMNAAA  | 9104 | 8847 | 7319 | 9.74 | AAACCAAA  | 1588 | 1646 | 344  | 4.40 | M00093        | DVVDAACWARDHBH | 0.789 | BR-C           |
| YKACACT   | 3972 | 3567 | 1618 | 9.74 | CGCACCT   | 890  | 804  | 170  | 5.69 | JASPAR_MA0086 | CAGGTG         | 0.853 | sna            |
| CGNCGSC   | 6216 | 6061 | 3690 | 9.72 | CGCCGCC   | 1820 | 1744 | 419  | 4.13 | -             | -              | 0     | -              |
| NYGTTGAC  | 2129 | 2124 | 650  | 9.70 | TCGTTGAC  | 356  | 317  | 60   | 6.15 | -             | -              | 0     | -              |
| CNCRTAG   | 1426 | 1336 | 354  | 9.70 | CATCGTAG  | 274  | 242  | 40   | 4.46 | -             | -              | 0     | -              |
| CASNTGC   | 8180 | 7671 | 5840 | 9.69 | CACTTGC   | 1788 | 1532 | 391  | 4.62 | M00060        | VHRRCAGGTGYVV  | 0.779 | Sn             |
| TCNTYCAT  | 2795 | 3130 | 1057 | 9.68 | TCGTTTAT  | 322  | 385  | 53   | 5.96 | -             | -              | 0     | -              |
| CCTGNAG   | 3748 | 3731 | 1589 | 9.65 | CCTGCAG   | 1804 | 1678 | 454  | 6.38 | -             | -              | 0     | -              |
| TNCTYGT   | 3412 | 3228 | 1271 | 9.65 | TGCTTGT   | 588  | 517  | 83   | 5.12 | -             | -              | 0     | -              |
| GCTGNYG   | 8094 | 8395 | 6260 | 9.62 | GCTGATG   | 1784 | 1710 | 430  | 5.62 | -             | -              | 0     | -              |
| TGAYCTY   | 3934 | 3540 | 1578 | 9.62 | TGATCTT   | 1585 | 1434 | 343  | 5.70 | M00111        | GRGGTCABB      | 0.756 | CF1            |
| CATGNTNG  | 3232 | 3008 | 1158 | 9.57 | CATGATGG  | 261  | 268  | 43   | 5.81 | -             | -              | 0     | -              |
| NTGATTKAT | 1625 | 1680 | 446  | 9.56 | TTGATTTAT | 459  | 458  | 74   | 6.26 | -             | -              | 0     | -              |
| TGATGYS   | 3937 | 3982 | 1735 | 9.50 | TGATGCG   | 1028 | 1064 | 224  | 7.06 | -             | -              | 0     | -              |
| ATGTCRYC  | 1082 | 1001 | 245  | 9.50 | ATGTCATC  | 349  | 343  | 50   | 4.80 | -             | -              | 0     | -              |
| CGCWKCAT  | 1224 | 1287 | 313  | 9.50 | CGCAGCAT  | 371  | 363  | 66   | 6.24 | -             | -              | 0     | -              |
| RRTGATK   | 6095 | 6301 | 3734 | 9.47 | ATTGATG   | 1739 | 2057 | 456  | 4.93 | -             | -              | 0     | -              |
| CCRGNTC   | 6174 | 5606 | 3435 | 9.45 | CCAGCTC   | 1973 | 1896 | 530  | 6.52 | -             | -              | 0     | -              |
| YSTCCAG   | 4579 | 4420 | 2170 | 9.44 | TGTCCAG   | 1628 | 1484 | 400  | 7.41 | -             | -              | 0     | -              |
| GCTCCWN   | 7296 | 6887 | 4772 | 9.42 | GCTCCTG   | 1639 | 1440 | 391  | 7.28 | -             | -              | 0     | -              |
| NCGCWGCA  | 3209 | 3207 | 1231 | 9.42 | TCGCTGCA  | 474  | 497  | 81   | 5.43 | -             | -              | 0     | -              |
| TYGWTGC   | 5537 | 5710 | 3143 | 9.39 | TTGATGC   | 1425 | 1468 | 312  | 5.08 | -             | -              | 0     | -              |
| CCACRTNG  | 2388 | 2076 | 704  | 9.38 | CCACATAG  | 319  | 335  | 48   | 5.19 | -             | -              | 0     | -              |
| YGATGACR  | 1381 | 1336 | 337  | 9.36 | TGATGACA  | 324  | 323  | 41   | 4.00 | -             | -              | 0     | -              |
| KCRCGCA   | 3364 | 3379 | 1346 | 9.36 | TCGCGCA   | 944  | 844  | 183  | 5.77 | -             | -              | 0     | -              |
| GSNCCGT   | 5524 | 5859 | 3224 | 9.35 | GGCCTG    | 1161 | 1093 | 226  | 4.49 | M00009        | GGTCCTGC       | 0.873 | Ttk            |
| TTWAWTGC  | 3177 | 2742 | 1048 | 9.34 | TTTATTGC  | 963  | 922  | 159  | 5.15 | M00090        | VBNTWDAYKVCNVB | 0.785 | Abd-B          |
| GCWCCWG   | 4786 | 4622 | 2333 | 9.33 | GCACCAG   | 1374 | 1594 | 332  | 4.78 | JASPAR_MA0086 | CAGGTG         | 0.793 | sna            |
| CNKCGTC   | 5646 | 5603 | 3162 | 9.31 | CGTCGTC   | 1216 | 1308 | 264  | 4.92 | -             | -              | 0     | -              |
| TTNCAYTT  | 6777 | 6171 | 4008 | 9.30 | TTTCAATT  | 2145 | 1923 | 515  | 5.22 | -             | -              | 0     | -              |
| TSCAGNTC  | 3612 | 3294 | 1382 | 9.30 | TCCAGCTC  | 771  | 774  | 154  | 6.98 | -             | -              | 0     | -              |
| CCTGWAS   | 1230 | 1137 | 290  | 9.29 | CCTTGAAC  | 371  | 359  | 54   | 4.22 | -             | -              | 0     | -              |
| GCRTGCGY  | 1028 | 1037 | 245  | 9.29 | GCATGCGC  | 328  | 295  | 56   | 5.79 | -             | -              | 0     | -              |
| TTSACCTY  | 1412 | 1346 | 347  | 9.29 | TTGACCTC  | 260  | 215  | 36   | 4.45 | -             | -              | 0     | -              |
| ANAAWCAA  | 6813 | 7030 | 4534 | 9.28 | ACAATCAA  | 609  | 821  | 100  | 4.33 | JASPAR_MA0010 | VBVAWWRACAARWN | 0.782 | Broad-complex_ |
| GNGTGKG   | 6298 | 7263 | 4347 | 9.26 | GGGTGGG   | 896  | 876  | 169  | 5.15 | -             | -              | 0     | -              |
| TNATGAYG  | 2394 | 2337 | 739  | 9.26 | TGATGATG  | 773  | 837  | 150  | 7.09 | -             | -              | 0     | -              |
| GYATRCGC  | 1024 | 968  | 235  | 9.25 | GCATACGC  | 284  | 295  | 50   | 5.65 | -             | -              | 0     | -              |
| TTGTNGTY  | 4284 | 4475 | 2008 | 9.25 | TTGTAGTC  | 323  | 305  | 43   | 4.44 | -             | -              | 0     | -              |
| ATTKNAAT  | 7684 | 6773 | 4894 | 9.21 | ATTGAAAT  | 1575 | 1432 | 310  | 4.16 | -             | -              | 0     | -              |
| GTGAARKT  | 1717 | 1607 | 443  | 9.19 | GTGAAATT  | 744  | 720  | 145  | 8.39 | -             | -              | 0     | -              |
| AAAGCTYN  | 3336 | 2866 | 1135 | 9.15 | AAAGCTTT  | 1041 | 792  | 164  | 5.74 | -             | -              | 0     | -              |
| AACNGCAR  | 3960 | 4412 | 1874 | 9.14 | AACCGCAA  | 385  | 431  | 70   | 6.05 | -             | -              | 0     | -              |
| GYGTSAC   | 2909 | 2819 | 1021 | 9.12 | GTGTGAC   | 1312 | 1269 | 271  | 5.64 | -             | -              | 0     | -              |
| GCSCACNT  | 2557 | 2205 | 756  | 9.10 | GCCACAT   | 437  | 639  | 66   | 4.04 | -             | -              | 0     | -              |
| AWWTCAATT | 2074 | 2052 | 588  | 9.06 | AATTCAATT | 686  | 655  | 117  | 7.24 | -             | -              | 0     | -              |
| CTTGWYG   | 4411 | 4132 | 1961 | 9.05 | CTTGATG   | 1548 | 1248 | 326  | 6.51 | -             | -              | 0     | -              |
| SKCCATG   | 4101 | 3960 | 1791 | 9.05 | GTCCATG   | 1150 | 1062 | 222  | 4.76 | -             | -              | 0     | -              |
| ACWTGACN  | 1913 | 1893 | 533  | 9.03 | ACTTGACC  | 309  | 272  | 45   | 4.69 | -             | -              | 0     | -              |
| GACANYTG  | 2592 | 2631 | 872  | 9.03 | GACATTTG  | 478  | 460  | 67   | 4.62 | -             | -              | 0     | -              |
| CCTYGCGN  | 1544 | 1364 | 382  | 9.02 | CCTTGCGC  | 344  | 247  | 50   | 4.90 | -             | -              | 0     | -              |
| TGNYGCC   | 7578 | 7497 | 5315 | 8.96 | TGATGCC   | 1219 | 1231 | 264  | 5.97 | -             | -              | 0     | -              |
| TGWCANTT  | 3173 | 3147 | 1166 | 8.94 | TGACAATT  | 555  | 516  | 80   | 5.09 | -             | -              | 0     | -              |
| GCTRATNA  | 3194 | 2922 | 1111 | 8.94 | GCTGATGA  | 542  | 501  | 81   | 4.85 | -             | -              | 0     | -              |
| NTGNTGAT  | 5511 | 5295 | 2901 | 8.92 | ATGCTGAT  | 534  | 592  | 81   | 4.88 | -             | -              | 0     | -              |
| GGCNTNCT  | 3744 | 3345 | 1425 | 8.88 | GGCCTTCT  | 416  | 355  | 70   | 5.89 | -             | -              | 0     | -              |
| TCCACNTS  | 3174 | 2840 | 1096 | 8.84 | TCCACATG  | 372  | 376  | 56   | 4.55 | -             | -              | 0     | -              |
| YGGCGSC   | 4897 | 4483 | 2288 | 8.83 | CGGCGGC   | 1834 | 1846 | 480  | 7.01 | -             | -              | 0     | -              |
| TCRWAGTC  | 1327 | 1349 | 322  | 8.81 | TCAAAGTC  | 534  | 590  | 79   | 4.17 | -             | -              | 0     | -              |
| NTTNTATG  | 6462 | 5837 | 3642 | 8.80 | CTTGATGT  | 447  | 336  | 58   | 4.57 | M00710        | WCATTWAM       | 0.763 | Zen            |
| CCARGGY   | 3378 | 3710 | 1433 | 8.80 | CCAAGGC   | 1181 | 1404 | 262  | 4.08 | -             | -              | 0     | -              |
| GNCMATAA  | 3003 | 2673 | 984  | 8.79 | GGCCATAA  | 576  | 500  | 90   | 5.30 | -             | -              | 0     | -              |
| GACATNRT  | 2098 | 1930 | 574  | 8.79 | GACATAAT  | 296  | 256  | 36   | 4.35 | -             | -              | 0     | -              |
| AKGCCNTC  | 1968 | 1974 | 564  | 8.78 | ATGCCCTC  | 295  | 270  | 44   | 4.57 | -             | -              | 0     | -              |
| NSGGCGT   | 5201 | 4530 | 2451 | 8.78 | AGGGCGT   | 784  | 664  | 136  | 4.90 | -             | -              | 0     | -              |
| NRTCACGT  | 1296 | 1199 | 299  | 8.77 | AGTCACGT  | 164  | 177  | 26   | 4.68 | -             | -              | 0     | -              |
| GCCNGCN   | 9421 | 9166 | 7807 | 8.77 | GCCAGCA   | 2448 | 2574 | 783  | 6.25 | -             | -              | 0     | -              |
| GCRTAMTT  | 1583 | 1297 | 358  | 8.72 | GCATACTT  | 448  | 333  | 64   | 5.53 | -             | -              | 0     | -              |
| NTTGCGCN  | 4129 | 3488 | 1603 | 8.69 | CTTGCGCT  | 463  | 336  | 67   | 4.70 | -             | -              | 0     | -              |
| RAAMGTGA  | 2018 | 2068 | 585  | 8.69 | GAAAAGTGA | 629  | 653  | 99   | 4.75 | -             | -              | 0     | -              |
| ANGYGTG   | 6147 | 6413 | 3813 | 8.68 | AGGTGTG   | 922  | 995  | 171  | 4.10 | -             | -              | 0     | -              |
| GCAAWTR   | 2987 | 2615 | 955  | 8.67 | GCAAATTG  | 874  | 850  | 153  | 5.40 | -             | -              | 0     | -              |
| SGCCAGYT  | 2009 | 1469 | 481  | 8.59 | GGCCAGCT  | 717  | 534  | 107  | 4.62 | -             | -              | 0     | -              |
| CRAAMAA   | 8124 | 8346 | 6226 | 8.59 | CAAAAAA   | 4885 | 5378 | 2601 | 7.14 | -             | -              | 0     | -              |

|           |       |       |      |      |           |      |      |      |      |               |                    |       |         |
|-----------|-------|-------|------|------|-----------|------|------|------|------|---------------|--------------------|-------|---------|
| TTAYGWCA  | 975   | 887   | 196  | 8.57 | TTATGACA  | 369  | 327  | 50   | 5.28 | -             | -                  | 0     | -       |
| AWGTTGCM  | 1862  | 1681  | 478  | 8.54 | ATGTTGCC  | 461  | 478  | 65   | 4.11 | -             | -                  | 0     | -       |
| CTTGTMTST | 1466  | 1171  | 321  | 8.50 | CTTGTACT  | 382  | 339  | 52   | 4.57 | -             | -                  | 0     | -       |
| TGNCCCTY  | 6708  | 6282  | 4061 | 8.50 | TGCCCTC   | 1106 | 1121 | 218  | 4.10 | -             | -                  | 0     | -       |
| YGCCKC    | 2913  | 2994  | 1060 | 8.45 | TGCGCTC   | 1248 | 1120 | 249  | 4.94 | -             | -                  | 0     | -       |
| KCNGCCT   | 6260  | 6693  | 4020 | 8.44 | GCCGCTC   | 1490 | 1534 | 333  | 4.12 | -             | -                  | 0     | -       |
| TCWYCTC   | 4279  | 4627  | 2081 | 8.41 | TCATCTC   | 1127 | 1268 | 229  | 4.08 | -             | -                  | 0     | -       |
| GCCACNNC  | 4910  | 5184  | 2576 | 8.40 | GCCACGCC  | 623  | 453  | 92   | 4.60 | -             | -                  | 0     | -       |
| ACAAARS   | 6418  | 6717  | 4117 | 8.39 | ACAAAAC   | 2898 | 3104 | 1008 | 5.80 | -             | -                  | 0     | -       |
| KCATGNA   | 6254  | 6600  | 3959 | 8.39 | TCATGAA   | 1222 | 1163 | 236  | 4.79 | -             | -                  | 0     | -       |
| TTGNCSAG  | 3928  | 3271  | 1460 | 8.37 | TTGCCAG   | 598  | 427  | 80   | 4.28 | -             | -                  | 0     | -       |
| CGCGNCW   | 4510  | 4694  | 2219 | 8.34 | CGCGCCA   | 917  | 956  | 176  | 4.69 | M00067        | VVBBCACGCKVSHB     | 0.76  | Hairy   |
| YNGGCGC   | 5766  | 5235  | 3019 | 8.28 | TTGGCGC   | 1671 | 1486 | 375  | 4.82 | -             | -                  | 0     | -       |
| TANTKTT   | 10370 | 9870  | 9146 | 8.26 | TATTTTT   | 6547 | 6002 | 3694 | 4.05 | -             | -                  | 0     | -       |
| GTRATTK   | 5617  | 5152  | 2891 | 8.26 | GTGATTT   | 1888 | 1568 | 402  | 4.31 | -             | -                  | 0     | -       |
| ATGTCNWG  | 2096  | 2013  | 589  | 8.23 | ATGTGCTG  | 213  | 223  | 31   | 4.34 | -             | -                  | 0     | -       |
| NGTCMTG   | 5193  | 4903  | 2592 | 8.22 | TGTCTG    | 775  | 892  | 135  | 4.12 | M00009        | GGTCCTGC           | 0.818 | Ttk     |
| WGYACTT   | 6143  | 5371  | 3241 | 8.20 | TGTACTT   | 1978 | 1713 | 459  | 5.21 | -             | -                  | 0     | -       |
| ATWAATTRC | 1033  | 1000  | 221  | 8.16 | ATTAATTGC | 277  | 237  | 40   | 4.36 | M00455        | DHRATTAVDN         | 0.75  | dri     |
| GTGTTGNY  | 4611  | 4786  | 2251 | 8.16 | TGTTTGCT  | 882  | 907  | 143  | 4.16 | -             | -                  | 0     | -       |
| GTACNTSA  | 1538  | 1569  | 390  | 8.14 | GTACATCA  | 238  | 270  | 34   | 4.31 | -             | -                  | 0     | -       |
| GGATSCN   | 6123  | 5124  | 3117 | 8.14 | GGATGCT   | 1063 | 1017 | 195  | 4.30 | -             | -                  | 0     | -       |
| ATGCANG   | 3808  | 3891  | 1619 | 8.13 | ATGCAGG   | 1199 | 1083 | 240  | 5.66 | -             | -                  | 0     | -       |
| TCGATNA   | 5288  | 4993  | 2656 | 8.13 | TCGATCA   | 1219 | 1193 | 238  | 4.54 | -             | -                  | 0     | -       |
| WTGACAMA  | 1781  | 1892  | 479  | 8.12 | TTGACACA  | 357  | 345  | 50   | 4.64 | -             | -                  | 0     | -       |
| ATTARCR   | 1148  | 989   | 235  | 8.08 | ATTAACAC  | 389  | 354  | 58   | 5.93 | JASPAR_MA0094 | TAAT               | 0.771 | Ubx     |
| CAAWTAANT | 2666  | 2265  | 766  | 8.07 | CAATAAAT  | 732  | 620  | 97   | 4.12 | M00020        | VVDVYAATTAAG       | 0.785 | Ftz     |
| CATGYCR   | 3402  | 3756  | 1433 | 8.07 | CATGCCA   | 1254 | 1597 | 310  | 5.66 | -             | -                  | 0     | -       |
| AANGCCAW  | 4086  | 4044  | 1767 | 8.05 | AAGGCCAA  | 607  | 572  | 96   | 4.93 | -             | -                  | 0     | -       |
| GGCCNYC   | 6040  | 5819  | 3435 | 8.04 | GGCCTTC   | 1104 | 1032 | 216  | 4.86 | -             | -                  | 0     | -       |
| CGANGAG   | 4327  | 4064  | 1886 | 8.02 | CGAGGAG   | 1761 | 1479 | 408  | 6.13 | -             | -                  | 0     | -       |
| TRYACAT   | 6407  | 6597  | 4021 | 7.99 | TGTACAT   | 2435 | 2924 | 836  | 6.79 | -             | -                  | 0     | -       |
| TTATGRS   | 4034  | 3778  | 1654 | 7.97 | TTATGAC   | 1089 | 868  | 184  | 4.96 | M00090        | VBNTWDAYKVCNVB     | 0.81  | Abd-B   |
| RCWAATGA  | 2043  | 1841  | 529  | 7.97 | ACAAATGA  | 734  | 726  | 112  | 5.00 | -             | -                  | 0     | -       |
| NGCCAWTT  | 4225  | 3812  | 1731 | 7.94 | CGCCATTT  | 536  | 574  | 88   | 4.71 | M00696        | YCAATTA            | 0.752 | En      |
| CTTNAKCT  | 3091  | 2717  | 999  | 7.90 | CTTCACTG  | 710  | 604  | 102  | 4.09 | -             | -                  | 0     | -       |
| CCWGCWGTG | 1506  | 1356  | 362  | 7.87 | CCAGCATG  | 401  | 389  | 68   | 5.16 | -             | -                  | 0     | -       |
| TNATTKT   | 10471 | 10138 | 9465 | 7.85 | TTATTTT   | 6292 | 5463 | 3272 | 4.32 | -             | -                  | 0     | -       |
| CATTTRCN  | 2638  | 2743  | 880  | 7.83 | CATTGTCT  | 365  | 411  | 56   | 5.00 | -             | -                  | 0     | -       |
| GTNGNCGT  | 3701  | 3561  | 1456 | 7.82 | GTGGGCGT  | 614  | 433  | 101  | 5.96 | -             | -                  | 0     | -       |
| AWGTMCTT  | 2005  | 1703  | 490  | 7.79 | AAGTACTT  | 557  | 522  | 80   | 5.12 | -             | -                  | 0     | -       |
| AWGTTSTC  | 1555  | 1476  | 366  | 7.71 | AAGTTCTC  | 457  | 386  | 65   | 5.51 | -             | -                  | 0     | -       |
| KGNTCGTA  | 1366  | 1418  | 326  | 7.66 | GGATCGTA  | 226  | 208  | 33   | 4.40 | -             | -                  | 0     | -       |
| ASGTGNT   | 5667  | 4847  | 2762 | 7.65 | AGGTGTT   | 1152 | 944  | 197  | 4.38 | M00044        | VBVABBTHGTDVBW     | 0.765 | Sn      |
| CGGANGY   | 5213  | 4539  | 2430 | 7.62 | CGGAAGT   | 1039 | 741  | 169  | 4.67 | JASPAR_MA0026 | BMGGAAR            | 0.781 | Eip74EF |
| TSCNCG    | 7088  | 6625  | 4443 | 7.60 | TGCTTGC   | 1490 | 1509 | 323  | 4.14 | -             | -                  | 0     | -       |
| KTCWACAA  | 1810  | 2044  | 499  | 7.56 | TTCAACAA  | 674  | 844  | 111  | 4.93 | -             | -                  | 0     | -       |
| SCCNAAA   | 7986  | 7933  | 5830 | 7.49 | CCCAAAA   | 2765 | 2736 | 861  | 4.58 | -             | -                  | 0     | -       |
| ANAAWAG   | 9286  | 9376  | 7844 | 7.48 | ATAAAAG   | 3034 | 3153 | 1060 | 4.59 | -             | -                  | 0     | -       |
| RCNTGCCA  | 2531  | 2758  | 862  | 7.45 | GCATGCCA  | 377  | 467  | 60   | 4.49 | -             | -                  | 0     | -       |
| CASYTCAT  | 1557  | 1299  | 339  | 7.45 | CAGTTCAT  | 485  | 402  | 65   | 4.52 | -             | -                  | 0     | -       |
| GMMNCTCCT | 2387  | 2117  | 679  | 7.43 | GAATCCT   | 423  | 314  | 58   | 4.23 | -             | -                  | 0     | -       |
| AAWTANTT  | 8462  | 7419  | 5770 | 7.39 | AAATATTT  | 3797 | 2927 | 1189 | 4.40 | -             | -                  | 0     | -       |
| TGACAGSN  | 1835  | 1927  | 502  | 7.35 | TGACAGCT  | 410  | 400  | 60   | 4.54 | -             | -                  | 0     | -       |
| ARCSAAG   | 1296  | 1292  | 297  | 7.25 | AACGGAAAG | 360  | 396  | 57   | 4.93 | -             | -                  | 0     | -       |
| TTGCNCT   | 5267  | 4953  | 2610 | 7.25 | TTGCCCT   | 1334 | 1234 | 270  | 4.37 | -             | -                  | 0     | -       |
| AAYTTKC   | 7015  | 6710  | 4422 | 7.19 | AACTTTC   | 2083 | 1688 | 468  | 4.97 | -             | -                  | 0     | -       |
| TTTCACAM  | 1340  | 1175  | 268  | 7.17 | TTTCACAC  | 568  | 543  | 81   | 4.60 | -             | -                  | 0     | -       |
| TCATTARR  | 1815  | 1521  | 409  | 7.15 | TCATTAAA  | 990  | 776  | 166  | 6.62 | M00018        | BDVBVBTAATKRBBHHVI | 0.786 | Ubx     |
| KGTCATN   | 2338  | 2290  | 680  | 7.15 | GGTCAATG  | 312  | 295  | 44   | 4.08 | -             | -                  | 0     | -       |
| GACACSNT  | 1364  | 1461  | 331  | 7.15 | GACACCAT  | 264  | 275  | 38   | 4.02 | -             | -                  | 0     | -       |
| GTWGTNG   | 6486  | 6574  | 4043 | 7.08 | GTAGTAG   | 846  | 825  | 143  | 4.16 | -             | -                  | 0     | -       |
| TMGTASAT  | 1068  | 1191  | 227  | 7.07 | TCGTAGAT  | 304  | 312  | 43   | 4.56 | -             | -                  | 0     | -       |
| CNATTGTN  | 5117  | 5009  | 2547 | 7.03 | CCATTGTT  | 599  | 585  | 89   | 4.24 | -             | -                  | 0     | -       |
| CANSTTTT  | 4291  | 3911  | 1746 | 7.03 | CATCTTTT  | 552  | 555  | 75   | 4.39 | -             | -                  | 0     | -       |
| CCATYCA   | 2841  | 3232  | 1062 | 7.00 | CCATCCA   | 1514 | 1761 | 375  | 4.64 | -             | -                  | 0     | -       |
| WGGAGTAY  | 1072  | 1025  | 215  | 7.00 | AGGAGTAC  | 290  | 299  | 46   | 5.09 | -             | -                  | 0     | -       |
| GCAYGGN   | 5236  | 5609  | 2900 | 6.96 | GCATGGT   | 806  | 728  | 130  | 4.07 | -             | -                  | 0     | -       |
| CCRTSAT   | 3197  | 3281  | 1193 | 6.89 | CCATGAT   | 980  | 984  | 178  | 4.46 | -             | -                  | 0     | -       |
| ATAAWTTAY | 1868  | 1437  | 395  | 6.87 | ATAAATTAT | 726  | 552  | 97   | 4.65 | -             | -                  | 0     | -       |
| ATGTSAYA  | 1206  | 1126  | 242  | 6.86 | ATGTGATA  | 372  | 303  | 47   | 4.98 | -             | -                  | 0     | -       |
| GYCTGGN   | 5900  | 6282  | 3556 | 6.85 | GTCTGGT   | 801  | 1031 | 153  | 4.18 | -             | -                  | 0     | -       |
| GTGTGKMA  | 1481  | 1855  | 399  | 6.66 | GTGTGGAA  | 426  | 492  | 64   | 4.22 | -             | -                  | 0     | -       |
| TYCTNGAA  | 3138  | 2656  | 964  | 6.54 | TTCTGGAA  | 511  | 513  | 72   | 4.39 | -             | -                  | 0     | -       |
| YGTNGGC   | 6627  | 6484  | 4072 | 6.46 | TGTAGGC   | 815  | 782  | 138  | 4.07 | -             | -                  | 0     | -       |
| CTKTSATT  | 2008  | 2080  | 534  | 6.38 | CTGTGATT  | 387  | 397  | 57   | 5.36 | -             | -                  | 0     | -       |
| ASTACATC  | 450   | 419   | 71   | 6.35 | AGTACATC  | 260  | 232  | 36   | 4.96 | -             | -                  | 0     | -       |
| CRWTGAAC  | 1358  | 1361  | 301  | 6.35 | CAATGAAC  | 429  | 392  | 62   | 5.23 | -             | -                  | 0     | -       |
| ATSGAGKA  | 1349  | 1365  | 298  | 6.22 | ATGGAGTA  | 263  | 248  | 35   | 4.45 | -             | -                  | 0     | -       |
| CSCACCM   | 3582  | 3951  | 1526 | 6.20 | CCCACCA   | 1500 | 1524 | 359  | 5.47 | -             | -                  | 0     | -       |
| CARCATNA  | 3110  | 3317  | 1139 | 6.07 | CAACATAA  | 557  | 490  | 72   | 4.21 | -             | -                  | 0     | -       |
| CGTAGGTTG | 225   | 158   | 36   | 6.00 | CGTAGGTTG | 225  | 158  | 36   | 6.00 | -             | -                  | 0     | -       |
| CMGYCCAT  | 1081  | 1066  | 219  | 5.99 | CGGCCAT   | 328  | 270  | 54   | 5.51 | -             | -                  | 0     | -       |
| TAAAMGYC  | 1348  | 1203  | 269  | 5.89 | TAAAGGCC  | 537  | 501  | 78   | 4.40 | -             | -                  | 0     | -       |
| GACCCANWT | 631   | 563   | 129  | 5.83 | GACCCAATT | 88   | 84   | 20   | 4.27 | -             | -                  | 0     | -       |
| AGAWGATCA | 240   | 224   | 46   | 5.80 | AGATGATCA | 104  | 103  | 20   | 4.28 | -             | -                  | 0     | -       |
| WWTGATTA  | 1093  | 964   | 188  | 5.61 | AATGATTA  | 277  | 234  | 35   | 4.71 | M00455        | DHRATTAVDN         | 0.817 | dri     |
| AAGSCMTA  | 996   | 1058  | 191  | 5.30 | AAGCCATA  | 404  | 402  | 59   | 4.66 | -             | -                  | 0     | -       |
| CGTAGTA   | 588   | 544   | 96   | 5.12 | CGTAGTA   | 588  | 544  | 96   | 5.12 | -             | -                  | 0     | -       |
